# Phrenic Nerve Palsy and Regional Anesthesia for Shoulder Surgery

## *Anatomical, Physiologic, and Clinical Considerations*

Kariem El-Boghdady, F.R.C.A., Ki Jinn Chin, F.R.C.P.C., Vincent W. S. Chan, F.R.C.P.C.

### ABSTRACT

Regional anesthesia has an established role in providing perioperative analgesia for shoulder surgery. However, phrenic nerve palsy is a significant complication that potentially limits the use of regional anesthesia, particularly in high-risk patients. The authors describe the anatomical, physiologic, and clinical principles relevant to phrenic nerve palsy in this context. They also present a comprehensive review of the strategies for reducing phrenic nerve palsy and its clinical impact while ensuring adequate analgesia for shoulder surgery. The most important of these include limiting local anesthetic dose and injection volume and performing the injection further away from the C5–C6 nerve roots. Targeting peripheral nerves supplying the shoulder, such as the suprascapular and axillary nerves, may be an effective alternative to brachial plexus blockade in selected patients. The optimal regional anesthetic approach in shoulder surgery should be tailored to individual patients based on comorbidities, type of surgery, and the principles described in this article. (**ANESTHESIOLOGY 2017; 127:173–91**)

**S**URGERY for shoulder pathology is increasingly common,<sup>1,2</sup> with regional anesthesia playing an important role in multimodal analgesia for these painful procedures.<sup>3</sup> Interscalene brachial plexus block is the most common regional anesthetic technique; however, phrenic nerve palsy and hemidiaphragmatic paresis have traditionally been inevitable consequences, which limit its utility in the population of patients at high risk of respiratory complications. A range of modifications and alternatives to interscalene block have been proposed to minimize the respiratory impact of phrenic nerve palsy, but to date there has been no thorough assessment of the clinical value offered by each of these strategies. In this article, we aim to describe the anatomical, physiologic, and clinical principles governing phrenic nerve palsy in the context of regional anesthesia for shoulder surgery. We also review the various techniques that seek to provide adequate regional anesthesia of the shoulder while minimizing the risk of phrenic nerve palsy, as well as methods for assessing their impact on diaphragmatic function, and thus provide a comprehensive narrative of their value in achieving these two objectives.

### Materials and Methods

For this narrative review, we systematically searched electronic databases including MEDLINE, PubMed-not-MEDLINE,

Excerpta Medica database (Embase), Cochrane Central Controlled Trials Database Register, and Cumulative Index to Nursing and Allied Health Literature (CINAHL), supplemented by a manual search. Search terms in medical subject headings, text words, and controlled vocabulary terms were used in permutations relevant to the components of this review. Search terms included (1) regional anesthesia; (2) local anesthesia; (3) shoulder; (4) surgery; (5) phrenic; (6) nerve; (7) diaphragm; and (8) diaphragmatic. Filters applied included (1) publication date January 1, 1946, to November 1, 2016; (2) English language; (3) human studies; and (4) adult studies. Eligible trials included randomized or quasirandomized controlled trials, controlled trials, case series, or pertinent correspondence that were deemed relevant or providing new knowledge on the subject in question. Trials were excluded if they produced no original empirical data, or if they were not directly relevant to phrenic nerve palsy related to regional anesthesia for shoulder surgery (fig. 1).

Studies were supplemented qualitatively with an informal literature search for relevant articles describing anatomical, physiologic, clinical, and diagnostic concepts so as to provide a comprehensive insight into the subject.

This article is featured in "This Month in Anesthesiology," page 1A. Figure 1 was enhanced by Annemarie B. Johnson, C.M.I., Medical Illustrator, Vivo Visuals, Winston-Salem, North Carolina.

Submitted for publication December 5, 2016. Accepted for publication March 1, 2017. From the Department of Anaesthesia, Guy's and St. Thomas' National Health Service Foundation Trust, London, United Kingdom (K.E.-B.); and Department of Anesthesia and Pain Medicine, Toronto Western Hospital, Toronto, Ontario, Canada (K.J.C., V.W.S.C.).

Copyright © 2017, the American Society of Anesthesiologists, Inc. Wolters Kluwer Health, Inc. All Rights Reserved. Anesthesiology 2017; 127:173–91

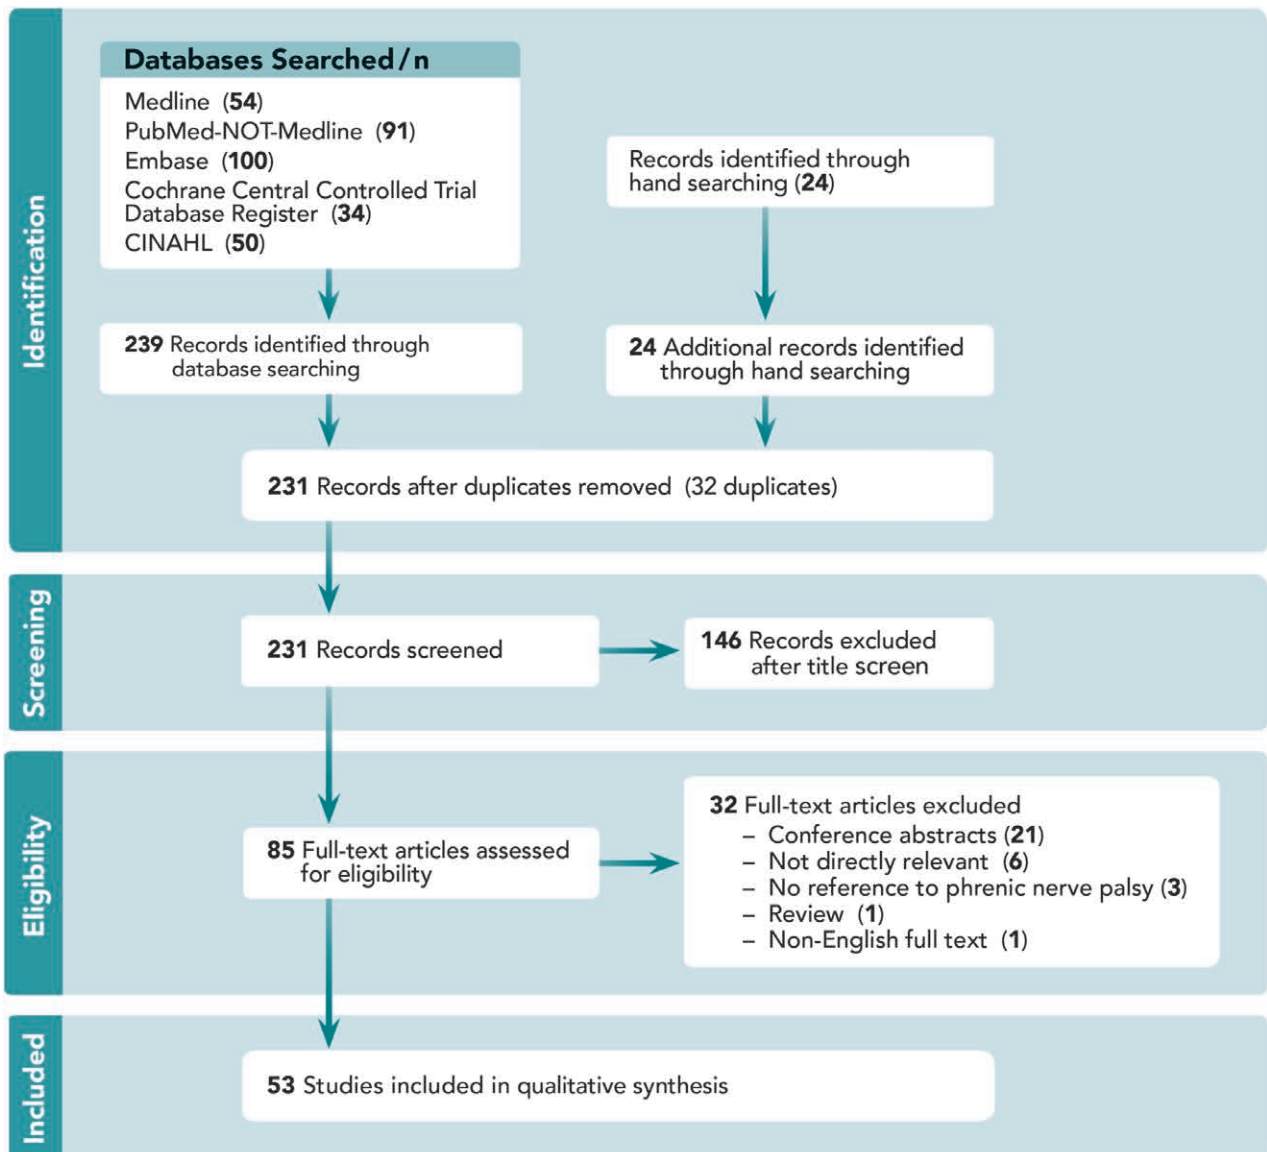

**Fig. 1.** Flowchart of study selection. CINAHL = Cumulative Index to Nursing and Allied Health Literature.

## Discussion

### *Regional Anesthesia Targets for Shoulder Analgesia*

Innervation of the cutaneous, muscular, bony, and capsular components of the shoulder is complex. Cutaneous innervation is provided by the axillary (C5–C6), suprascapular nerve (C5–C6), and supraclavicular nerves of the cervical plexus (C3–C4). Bony and capsular components are innervated by the suprascapular, axillary, lateral pectoral (C5–C7), musculocutaneous (C5–C7), and long thoracic (C5–C7) nerves (fig. 2). The suprascapular nerve provides up to 70% of the innervation to the glenohumeral joint,<sup>4</sup> with the axillary nerve supplying the majority of the remaining joint capsule. Sensory contributions to the muscles of the shoulder comprise the following: the ventral rami of the third and fourth cervical nerves to the trapezius muscle, the pectoral nerves (C5–C7) to the pectoral muscles, the dorsal scapular nerve (C5) to the levator scapulae and rhomboid

muscles, and the axillary nerve (C5–C6) to the deltoid muscle. The rotator cuff muscles are innervated by the suprascapular, upper and lower subscapular (C5–C6), and axillary nerves.

The clinical aim of regional anesthesia or analgesia is to deliver local anesthetic to some or all of these key nerves that contribute to pain after shoulder surgery. The specific nerves to be targeted will depend in part on the surgical approach that is used (fig. 2). This traditionally has been achieved by performing an interscalene block, which targets the C5 and C6 roots of the brachial plexus in the interscalene region. However, conventional interscalene block is associated with several complications, the most common of which is phrenic nerve palsy with ensuing hemidiaphragmatic paresis, and this has driven the development of modifications to the interscalene block as well as alternative techniques that target the peripheral sensory supply to the shoulder at sites distal to the C5 and C6 roots.

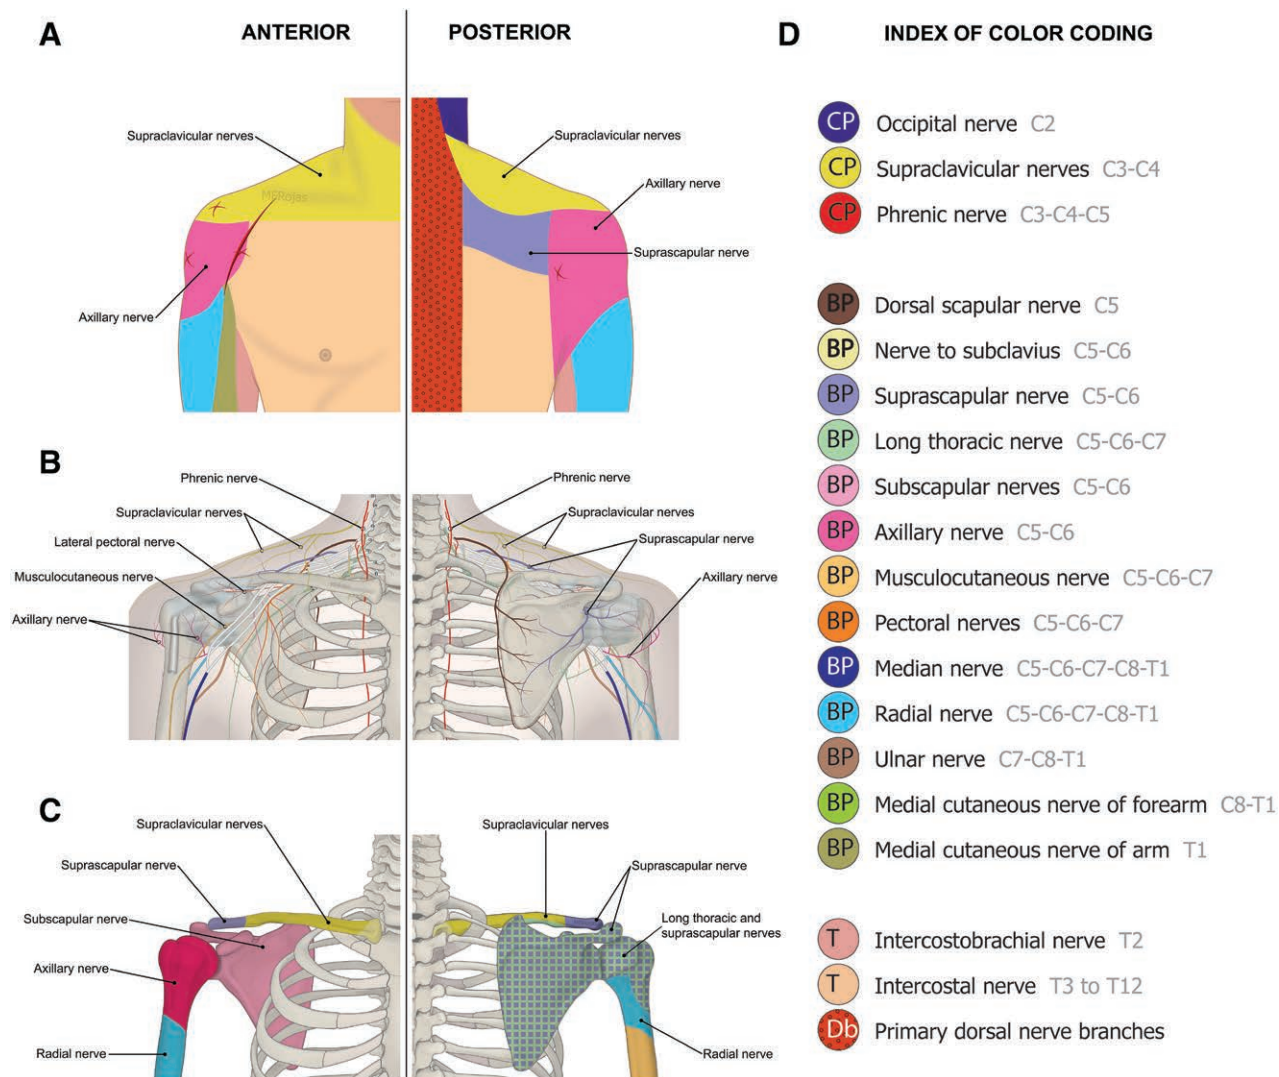

**Fig. 2.** Anterior (left) and posterior (right) innervation of the shoulder. (A) The distribution of cutaneous innervation of the shoulder. Common port-hole incisions (red crosses), including superior, anterior, lateral, and posterior incisions made for arthroscopic shoulder surgery and the deltopectoral incision (red line) for open shoulder surgery are represented. (B) The route taken by nerves to supply both skin and bone in the shoulder. (C) The osteotomal supply of the shoulder. (D) An index of color coding of dermatomes, nerves, and osteotomes. Images adapted with permission from Maria Fernanda Rojas Gomez and reproduced with permission from Ultrasound for Regional Anesthesia (USRA; <http://www.usra.ca>).

### Anatomy of the Phrenic Nerve

The anatomy of the phrenic nerve is key to understanding the basis for the strategies to reduce the risk of phrenic nerve palsy. The phrenic nerve originates primarily from the fourth cervical ventral ramus but also receives contributions from both third and fifth ventral rami, as well as the cervical sympathetic ganglia or thoracic sympathetic plexus.<sup>5</sup> This small nerve forms at the upper lateral border of the anterior scalene muscle and descends obliquely across the anterior surface of the muscle toward its medial border (fig. 3). The phrenic nerve lies deep to the prevertebral fascia here and remains posterior to the sternocleidomastoid muscle, the inferior belly of the omohyoid, the internal jugular vein, the dorsal scapular and transverse cervical arteries, and the thoracic duct on the left. The phrenic nerve courses in close

proximity to the brachial plexus, initially lying 18 to 20 mm medial to the C5 nerve root at the level of the cricoid cartilage (C5/C6) but diverging an additional 3 mm further away for every centimeter that it descends over the anterior scalene muscle (fig. 3).<sup>6</sup> As it approaches the root of the neck, the phrenic nerve usually lies between the subclavian artery and vein, before coursing medially in front of the internal thoracic artery (fig. 4).

An accessory phrenic nerve is present in 60 to 75% of individuals and provides an independent contribution to the phrenic nerve. The fibers of the accessory phrenic nerve arise primarily from C5 and run within the nerve to subclavius, the ansa cervicalis, or the nerve to sternohyoid.<sup>7</sup> These fibers then emerge from any one of these nerves to form the accessory phrenic nerve, which then joins the phrenic nerve



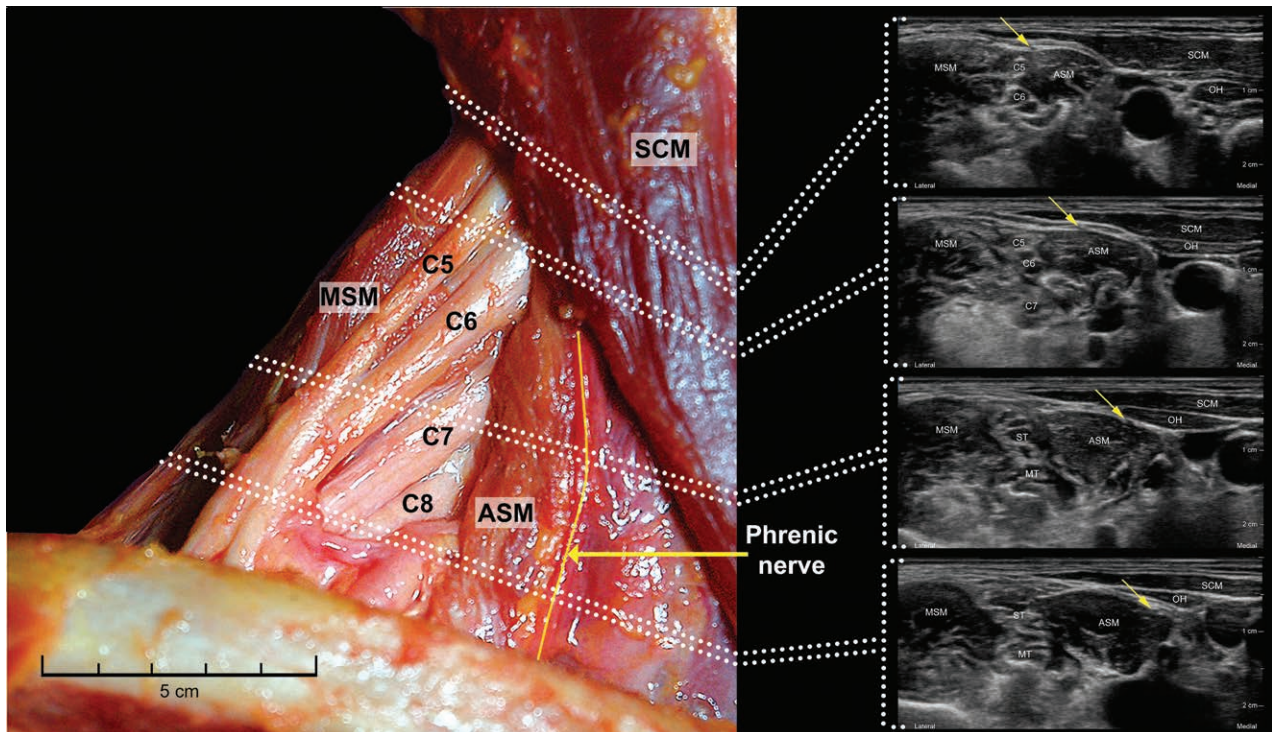

**Fig. 3.** Cadaveric (*left*) and corresponding sonographic images (*right*) demonstrating the course of the right phrenic nerve as it emerges beneath the lateral margin of the sternocleidomastoid muscle (SCM), between the middle scalene muscle (MSM) and the anterior scalene muscle (ASM). It begins near to the roots of the brachial plexus, then travels inferomedially away from the brachial plexus. The C5–C7 roots of the brachial plexus emerge deep to the ASM, coursing laterally, where C5 and C6 roots merge to form the superior trunk. The sonographic images of the right interscalene area descending sequentially caudally, with the brachial plexus found between the MSM and the ASM. In the *upper image*, the phrenic nerve (*yellow arrow*) can be seen above (superficial to) the ASM in close proximity to the C5 nerve root. More caudally, the phrenic nerve (*yellow arrow*) can be seen to travel medially over the ASM and beneath the omohyoid (OH) muscle until it lies nearly 2 cm away from the brachial plexus. MT = middle trunk; ST = superior trunk. *Left image* adapted with permission from Danilo Jankovic and reproduced with permission from Ultrasound for Regional Anesthesia (USRA; <http://www.usra.ca>).

at a variable location along its course.<sup>8,9</sup> Isolated damage to the accessory phrenic nerve is associated with diaphragmatic dysfunction,<sup>10</sup> and similarly, reports suggest that local anesthetic blockade of the accessory nerve also may lead to diaphragmatic paresis.<sup>11,12</sup>

### **Mechanisms of Phrenic Nerve Palsy after Regional Anesthesia**

**Transient Phrenic Nerve Palsy.** Phrenic nerve palsy leading to hemidiaphragmatic paresis may be a temporary or persistent phenomenon after interscalene block or other injections of local anesthetic in the neck. Transient phrenic nerve palsy is caused by local anesthetic spreading directly to the phrenic nerve and its contributing nerves (including the accessory phrenic nerve) or proximally to the roots of the phrenic nerve. The duration of phrenic nerve palsy is determined by the duration of local anesthetic effect, which in turn is related primarily to the type and mass of local anesthetic administered. The incidence of transient phrenic nerve palsy is virtually 100% after landmark- and paresthesia-guided interscalene block techniques that use a large-volume injection of 20 ml or greater.<sup>13,14</sup>

Despite this, the vast majority of patients in clinical trials of interscalene block exhibit few symptoms and require no specific treatment.<sup>15–17</sup> Thus, on the surface, transient phrenic nerve palsy appears to have little clinical significance in terms of both objective (respiratory support) and subjective (dyspnea) features. However, randomized controlled trials generally exclude patients with pulmonary disease, obesity, or obstructive sleep apnea, and this therefore hinders the generalizability of the results reported in the literature. A significant proportion of these subgroups of patients are likely to develop symptoms or require treatment after phrenic nerve palsy, but unfortunately data on these high-risk populations usually are confined to the realm of case reports.

There is also a lack of studies formally examining clinical predictors of symptomatic phrenic nerve palsy after interscalene block, and thus it remains difficult to determine which patients, healthy or otherwise, will benefit most from avoidance of phrenic nerve palsy. It therefore falls to the individual anesthesiologist to assess the likely impact of phrenic nerve palsy in any given patient undergoing shoulder surgery and to select the appropriate regional anesthetic technique accordingly.

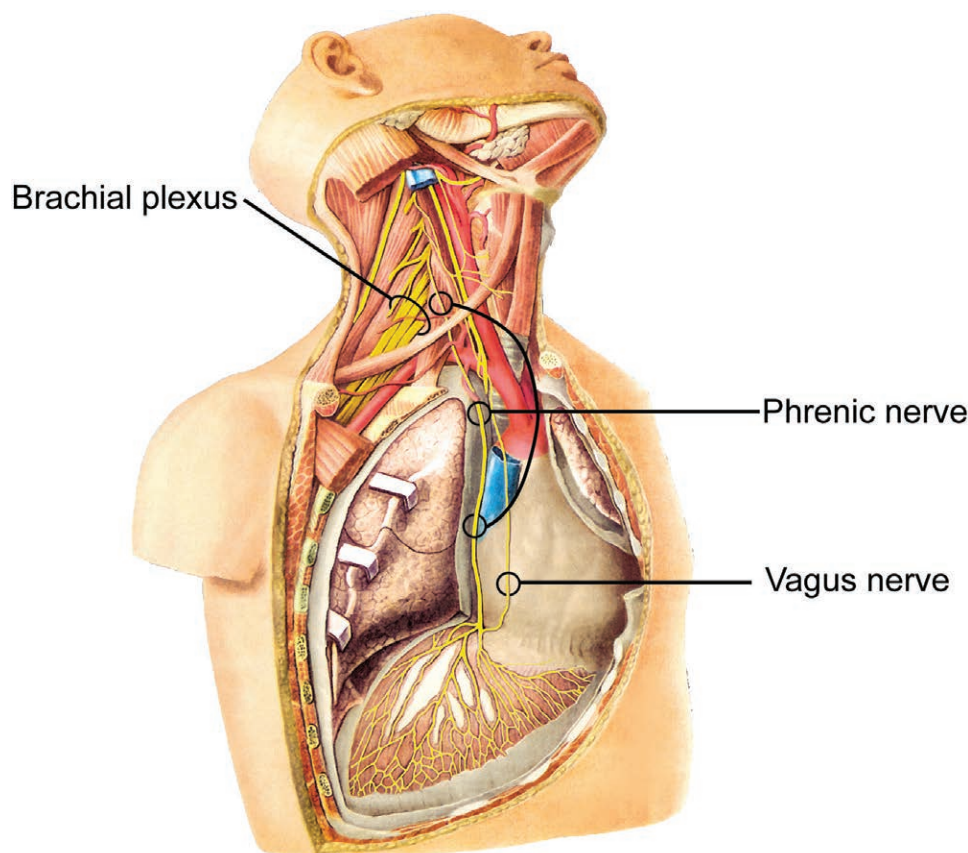

**Fig. 4.** Illustration demonstrating the course of the phrenic nerve from the root of the neck, through the thorax, and terminating at the diaphragm. Image adapted with permission from Danilo Jankovic and reproduced with permission from Ultrasound for Regional Anesthesia (USRA; <http://www.usra.ca>).

**Persistent Phrenic Nerve Palsy.** Persistent phrenic nerve palsy after interscalene block is a complication that has recently gained wider recognition, and its incidence has been estimated from case series data to range from 1 in 2,000<sup>18</sup> up to 1 in 100.<sup>19</sup> There are several potential causes of persistent phrenic nerve palsy that have been put forth in the literature. Nerve damage due to direct needle trauma or intraneural injection has been implicated in case reports of persistent phrenic nerve palsy after landmark-guided interscalene block techniques,<sup>20–23</sup> but not so far with ultrasound-guided interscalene block. Inflammatory scarring causing nerve entrapment has been reported with both landmark-guided and ultrasound-guided interscalene block, and although it has been suggested that this scarring may be related to local anesthetic myotoxicity,<sup>24,25</sup> these are postulated mechanisms without direct supporting evidence at present. A “double crush” syndrome<sup>26</sup> due to previous cervical spine stenosis along with nerve trauma also may contribute to persistent phrenic nerve palsy.<sup>18</sup> Finally, a “triple crush” mechanism that includes pressure ischemia resulting from high volumes of local anesthetic injected within the tight confines of the interscalene sheath also has been postulated.<sup>27</sup> It must be noted that these causes of persistent phrenic nerve palsy differ from those implicated in transient phrenic nerve palsy,

and thus it cannot be assumed that strategies to reduce the risk of the latter will also reduce the risk of the former.

#### **Physiologic Effects of Phrenic Nerve Palsy**

The diaphragm is the most important inspiratory muscle, accounting for 75% of the increase in lung volume during quiet inspiration; intercostal, scalene, and sternocleidomastoid muscles contribute the remaining 25%. There is little crossover innervation of the right and left hemidiaphragms, and each can contract independently of the other in the event of unilateral phrenic nerve palsy. In the presence of diaphragmatic paresis, inspiration is achieved largely by contraction of intercostal and accessory muscles and expansion of the rib cage.<sup>28</sup> Pleural pressure is reduced, which leads to air intake and expansion of intrathoracic volume.<sup>29</sup> However, this reduction in pleural pressure during inspiration also causes the paralyzed diaphragm to move cephalad and the abdominal muscles inward. Consequently, there is reduced lung ventilation on the affected side, particularly of the lower lobe.<sup>28,30</sup> In healthy individuals, however, tidal volumes remain unchanged due to a greater contribution from the rib cage.<sup>11,28</sup> In higher-risk patient groups, hypoxia and dyspnea may ensue and require treatment by sitting the patient upright and administering supplemental oxygen



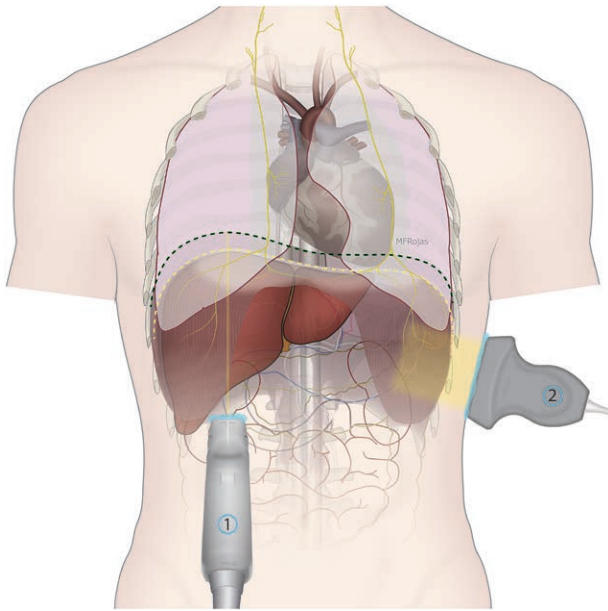

**Fig. 5.** Diaphragmatic ultrasound. Curved array transducer (1) position for scanning the diaphragm in the midclavicular, right subcostal margin using the liver as an acoustic window, and linear array transducer (2) on the left in the midaxillary line at the level of ribs eight to nine. Image reproduced with permission from Maria Fernanda Rojas Gomez and Ultrasound for Regional Anesthesia (USRA; <http://www.usra.ca>).

therapy or, in severe cases, instituting noninvasive or invasive ventilatory support to augment tidal volumes.

Subjectively, dyspnea is the cardinal symptom of phrenic nerve palsy after interscalene block. However, just as phrenic nerve palsy does not always result in dyspnea, dyspnea may also be experienced in the absence of phrenic nerve palsy.<sup>31–38</sup> Although up to 40% of patients complain of dyspnea after interscalene block or supraclavicular block,<sup>14,17,39</sup> only one third<sup>40</sup> to three quarters<sup>41</sup> of these patients have objective evidence of phrenic nerve palsy. Patients who are obese are more likely to experience dyspnea in association with phrenic nerve palsy.<sup>42</sup> Thus, although dyspnea clearly is more prevalent in the presence of phrenic nerve palsy,<sup>42</sup> it is neither sensitive nor specific for phrenic nerve palsy. Dyspnea after interscalene block might not be related to the block itself, and other causes must be sought and excluded.

### Assessing the Severity of Phrenic Nerve Palsy

The impact of phrenic nerve palsy on respiratory function may be quantified by several bedside methods, including pulse oximetry, pulmonary function tests, and sonographic evaluation of the diaphragm.

**Oxygen Saturation.** Hypoxemia secondary to unilateral phrenic nerve palsy after regional anesthesia has a low diagnostic sensitivity due to the mechanics of respiratory compensation. Accessory muscles and the contralateral diaphragm both contribute to maintaining gas exchange.

There are conflicting data regarding the incidence and extent of hypoxemia after unilateral phrenic nerve palsy, which probably reflects its multifactorial etiology. Contemporary studies in healthy patients with unilateral phrenic nerve palsy suggest that oxygen saturations may remain unchanged<sup>40</sup> or decrease by less than 7%.<sup>16,43,44</sup> The limited extent of this change correlates with a reduction in  $P_{aO_2}$  of 6 to 7 mmHg and an increase in  $P_{aCO_2}$  of only 3 mmHg.<sup>28</sup> In contrast, hypoxemia may be more significant after interscalene block in patients with multiple comorbidities and who receive higher volumes and/or concentrations of local anesthetic.<sup>33,34,45</sup> In one study of patients with chronic renal failure undergoing arteriovenous fistula surgery, 10% had oxygen saturations less than 85% on room air after a high-volume (30 ml) interscalene block.<sup>45</sup> In another study, brief episodes of oxygen saturations less than 85% after interscalene block with 20 to 28 ml bupivacaine, 0.75%, were seen in 4 of 10 patients, three of whom were obese.<sup>33</sup>

**Pulmonary Function Tests.** Pulmonary function tests using bedside spirometry to assess diaphragmatic function should be performed with the patient in the semirecumbent position, with the head up at 45°. Baseline pulmonary function tests ideally should be performed before block performance to place postblock values into context and more accurately quantify any deterioration. However, isolated testing after block performance may be compared with predicted values based on patient demographics, although this is less accurate than a comparison with baseline values. Unilateral phrenic nerve injury not related to regional anesthesia reduces the total lung capacity (by 14 to 29%), forced vital capacity (by 23 to 27%), and inspiratory capacity (by 10 to 20%) compared with baseline or predicted parameters.<sup>46–49</sup> Unilateral phrenic nerve palsy after interscalene block reduces the forced expiratory volume in 1 s ( $FEV_1$ ) by 16 to 40%,<sup>17,50</sup> the forced vital capacity by 13 to 40%,<sup>36,50</sup> and the peak expiratory flow rates by 15 to 43% (tables 1 and 2).<sup>36,40</sup>

**Ultrasound.** The assessment of phrenic nerve palsy using ultrasound relies on visualizing the diaphragm and quantifying the magnitude and direction of its movement with respiration. The most common method involves placing a 3- to 5-MHz curved array transducer inferior to the costal margin and in a longitudinal parasagittal orientation in the anterior axillary line on the left or in the midclavicular line on the right (fig. 5). The ultrasound beam is directed medially and cephalad to visualize the posterior third of the hemidiaphragm by using either the spleen or the liver as an acoustic window (fig. 6) in a two-dimensional B-mode. Visualization on the left often is technically more challenging due to the smaller acoustic window of the spleen and the presence of the air-filled stomach. Once a view of the curved, hyperechoic diaphragmatic line has been obtained, M-mode sonography is used to quantify the extent of diaphragmatic excursion. In men, the normal displacement of an unaffected diaphragm is  $1.8 \pm 0.3$ ,  $7.0 \pm 0.6$ , and  $2.9 \pm 0.6$  cm in quiet breathing, deep breathing, and sniffing, respectively,

**Table 1.** Characteristics of Relevant Studies of Regional Anesthesia Techniques for Shoulder Surgery

| Study                                               | Characteristics              |                                                                                 |                                                    |                                  |                        |                                |
|-----------------------------------------------------|------------------------------|---------------------------------------------------------------------------------|----------------------------------------------------|----------------------------------|------------------------|--------------------------------|
|                                                     | Interscalene Block Technique | Comparison                                                                      | Target                                             | Drug                             | Concentration          | Dose                           |
| Noncomparative studies                              |                              |                                                                                 |                                                    |                                  |                        |                                |
| Urney <i>et al.</i> , <sup>14</sup> 1991, n = 13    | SS, LM                       | —                                                                               | IS (Winnie approach, C5, C6)                       | Mepivacaine                      | 1.5%                   | 34–52 ml                       |
| Urney and McDonald, <sup>13</sup> 1992, n = 8       | SS, LM                       | —                                                                               | IS (Winnie approach, C5, C6)                       | Mepivacaine                      | 1.5%                   | 45 ml                          |
| Neal <i>et al.</i> , <sup>11</sup> 1998, n = 8      | SS, LM                       | —                                                                               | SC (plumb-bob technique)                           | Lidocaine                        | 1.5%                   | 30 ml                          |
| Volume effect                                       |                              |                                                                                 |                                                    |                                  |                        |                                |
| Urney and Gloegler, <sup>50</sup> 1993, n = 20      | SS, LM                       | LA volume 20 ml vs. 45 ml                                                       | IS (Winnie approach, C5, C6)                       | Mepivacaine                      | 1.5%                   | 45 ml                          |
| Sinha <i>et al.</i> , <sup>51</sup> 2011, n = 30    | SS, USG                      | LA volume 10 ml vs. 20 ml                                                       | IS, intraplexus C5, C6, or C7 roots                | Ropivacaine                      | 0.5%                   | 20 ml                          |
| Riazi <i>et al.</i> , <sup>16</sup> 2008, n = 40    | SS, USG                      | LA volume 5 ml vs. 20 ml                                                        | IS, intraplexus C5, C6 roots                       | Ropivacaine                      | 0.5%                   | 20 ml                          |
| Lee <i>et al.</i> , <sup>52</sup> 2011, n = 60      | SS, USG                      | LA volume 5 ml vs. 10 ml                                                        | IS, intraplexus C5, C6 roots                       | Ropivacaine                      | 0.75%                  | 5 ml                           |
| Concentration effect                                |                              |                                                                                 |                                                    |                                  |                        |                                |
| Al-Kaisy <i>et al.</i> , <sup>36</sup> 1991, n = 11 | SS, NS                       | LA concentration 0.25% vs. 0.5%                                                 | C5, C6                                             | Bupivacaine                      | 0.5%                   | 10 ml                          |
| Casati <i>et al.</i> , <sup>53</sup> 1999, n = 30   | SS, NS                       | LA concentration ropivacaine 0.5% vs. ropivacaine 0.75% vs. mepivacaine 2%      | IS (Winnie approach, C5, C6)                       | Mepivacaine                      | 0.25%                  | 10 ml                          |
|                                                     |                              |                                                                                 |                                                    | Ropivacaine                      | 2%                     | 20 ml                          |
|                                                     |                              |                                                                                 |                                                    | Ropivacaine                      | 0.75%                  | 20 ml                          |
| Wong <i>et al.</i> , <sup>43</sup> 2016, n = 50     | SS, USG                      | LA concentration 0.1% vs. 0.2%                                                  | IS, intraplexus around trunks                      | Ropivacaine                      | 0.5%                   | 20 ml                          |
|                                                     |                              |                                                                                 |                                                    | Ropivacaine                      | 0.2%                   | 20 ml                          |
|                                                     |                              |                                                                                 |                                                    | Ropivacaine                      | 0.1%                   | 20 ml                          |
| Al-Kaisy <i>et al.</i> , <sup>54</sup> 1998, n = 30 | SS, NS                       | LA concentration 0.125% vs. placebo                                             | C5, C6                                             | 0.9% saline                      | Placebo                | 10 ml                          |
|                                                     |                              |                                                                                 |                                                    | Bupivacaine                      | 0.125%                 | 10 ml                          |
| Concentration and volume effect                     |                              |                                                                                 |                                                    |                                  |                        |                                |
| Pippa <i>et al.</i> , <sup>55</sup> 2006, n = 60    | SS, NS                       | LA concentration and volume 0.25/1% vs. 0.5/2% 60 (30/30) ml vs. 30 (15/15) ml  | IS (Winnie approach, C5, C6)                       | Bupivacaine/lidocaine            | 0.25/1%<br>0.5/2%      | 60 (30/30) ml<br>30 (15/15) ml |
| Zhai <i>et al.</i> , <sup>56</sup> 2016, n = 95     | SS, USG                      | LA concentration and volume 0.25% vs. 0.5% vs. 0.75% 20 ml vs. 10 ml vs. 6.7 ml | IS, intraplexus C5, C6 roots                       | Ropivacaine                      | 0.25%<br>0.5%<br>0.75% | 20 ml<br>10 ml<br>6.7 ml       |
| Injection below C6                                  |                              |                                                                                 |                                                    |                                  |                        |                                |
| Renes <i>et al.</i> , <sup>15</sup> 2009, n = 30    | SS, USG/NS                   | Localization method USG vs. NS                                                  | IS, intraplexus C7 root                            | NS ropivacaine                   | 0.75%                  | 10 ml                          |
|                                                     |                              |                                                                                 |                                                    | US ropivacaine                   |                        | 10 ml                          |
| Petrar <i>et al.</i> , <sup>41</sup> 2015, n = 64   | SS, USG                      | Injection site supraclavicular vs. infraclavicular                              | IS, intraplexus<br>IC, posterior and lateral cords | SC ropivacaine<br>IC ropivacaine | 0.5%                   | 30 ml<br>30 ml                 |

(Continued)

Table 1. (Continued)

| Study                                                | Characteristics              |                                                 |                                                                               |                            |                 |                                |
|------------------------------------------------------|------------------------------|-------------------------------------------------|-------------------------------------------------------------------------------|----------------------------|-----------------|--------------------------------|
|                                                      | Interscalene Block Technique | Comparison                                      | Target                                                                        | Drug                       | Concentration   | Dose                           |
| <b>Extrafascial injection</b>                        |                              |                                                 |                                                                               |                            |                 |                                |
| Palhais <i>et al.</i> , <sup>17</sup> 2016, n = 40   | SS, USG                      | Injection site extrafascial vs. intraplexus     | IS, intraplexus C5, C6 roots<br>IS, extrafascial 4 mm lateral to C5, C6 roots | Bupivacaine<br>Bupivacaine | 0.5%            | 100 mg<br>100 mg               |
| <b>Catheter technique</b>                            |                              |                                                 |                                                                               |                            |                 |                                |
| Renes <i>et al.</i> , <sup>57</sup> 2010, n = 20     | Catheter, USG                | Minimum effective volume                        | IS, intraplexus C7 root                                                       | Ropivacaine                | 0.75%           | 15–45 mg                       |
| Stundner <i>et al.</i> , <sup>58</sup> 2016, n = 30  | Catheter, USG                | LA volume 5 ml vs. 20 ml                        | IS, intraplexus C5, C6 roots                                                  | Ropivacaine                | 0.75%           | 150 mg<br>37.5 mg              |
| Hartrick <i>et al.</i> , <sup>42</sup> 2012, n = 36  | Catheter, USG                | LA volume 20 ml vs. 10 ml vs. 5 ml              | IS, intraplexus C5 root                                                       | Ropivacaine                | 0.75%           | 150 mg<br>75 mg<br>37.5 mg     |
| Thackeray <i>et al.</i> , <sup>44</sup> 2013, n = 30 | Catheter, USG                | LA concentration 0.125% vs. 0.25%               | IS, intraplexus C6                                                            | Bupivacaine                | 0.25%<br>0.125% | 50 mg<br>25 mg                 |
| Koh <i>et al.</i> , <sup>59</sup> 2016, n = 75       | Catheter, USG                | Injection site interscalene vs. supraclavicular | IS, intraplexus C5, C6 roots<br>SC, intraplexus                               | Ropivacaine<br>Ropivacaine | 0.375%          | 75 mg<br>75 mg                 |
| Wiesmann <i>et al.</i> , <sup>40</sup> 2016, n = 114 | Catheter, USG                | Injection site interscalene vs. supraclavicular | SC, between upper and middle trunks<br>IS, between upper and middle trunks    | Ropivacaine                | 0.2%            | 10 ml + 4 ml/h<br>+ 4-ml bolus |

Studies are divided into those assessing outcomes noncomparatively, as well as those describing outcomes by comparing volume effect, concentration effect, injection below C6, extrafascial injection, and catheter techniques.

IC = infraclavicular; IS = interscalene; LA = local anesthetic; LM = landmark; NS = nerve stimulator; SC = supraclavicular; SS = single shot; US = ultrasound; USG = ultrasound-guided.



**Table 2.** Incidence and Magnitude of Phrenic Nerve Palsy and Analgesic Outcomes of Relevant Studies of Regional Anesthesia Techniques for Shoulder Surgery

| Study                                               | Monitoring for PNP | US Evidence of PNP                        | Incidence/Magnitude                |                 |                     |                   | Analgesic Outcomes |             |                                                                                      | Remarks                                                                                                                                                    |
|-----------------------------------------------------|--------------------|-------------------------------------------|------------------------------------|-----------------|---------------------|-------------------|--------------------|-------------|--------------------------------------------------------------------------------------|------------------------------------------------------------------------------------------------------------------------------------------------------------|
|                                                     |                    |                                           | FEV <sub>1</sub> Change            | FVC Change      | PEFR Change         | Oxygen Saturation | Dyspnea            | Pain Scores | Analgesic Consumption                                                                |                                                                                                                                                            |
| Noncomparative studies                              |                    |                                           |                                    |                 |                     |                   |                    |             |                                                                                      |                                                                                                                                                            |
| Urmey <i>et al.</i> , <sup>14</sup> 1991, n = 13    | US                 | Sniff +5.96cm to -4.53cm (176% reduction) | —                                  | —               | —                   | —                 | 38%                | —           | —                                                                                    | —                                                                                                                                                          |
| Urmey and McDonald, <sup>13</sup> 1992, n = 8       | US, PFTs           | 100%                                      | -26.4%                             | -27.2%          | -15.4%              | —                 | —                  | —           | —                                                                                    | Magnetometry demonstrating increased chest wall movement (indicating use of intercostal and accessory muscles) with reduced ipsilateral abdominal movement |
| Neal <i>et al.</i> , <sup>11</sup> 1998, n = 8      | US, PFTs           | 50%                                       | Paralyzed: +6%<br>Nonparalyzed: 0% | +2%<br>+2%      | +7%<br>+6%          | 0%                | 0%                 | —           | —                                                                                    | —                                                                                                                                                          |
| Volume effect                                       |                    |                                           |                                    |                 |                     |                   |                    |             |                                                                                      |                                                                                                                                                            |
| Urmey and Gloeggler, <sup>50</sup> 1993, n = 20     | US, PFTs           | 100%                                      | -39.9%                             | -40.9%          | -35.9%              | —                 | —                  | —           | —                                                                                    | —                                                                                                                                                          |
| Sinha <i>et al.</i> , <sup>51</sup> 2011, n = 30    | US, PFTs           | 93%                                       | -35%                               | -32%            | -19%                | —                 | —                  | —           | PACU fentanyl, 0 µg; home hydrocodone, 25 mg                                         | No significant difference in analgesic consumption                                                                                                         |
| Riazi <i>et al.</i> , <sup>16</sup> 2008, n = 40    | US, PFTs           | 100%                                      | -29%<br>-1.23 l                    | -31%<br>-1.59 l | -23%<br>-2.50 l/min | —                 | 5%                 | —           | 0 µg, 30 mg<br>Intraoperative fentanyl, 107.5 µg; PACU MEQ, 1.3mg; 24-h MEQ, 26.5 mg | No significant difference in pain scores or analgesic consumption                                                                                          |
| Lee <i>et al.</i> , <sup>52</sup> 2011, n = 60      | CXR                | 45%                                       | -0.83 l                            | -0.7 l          | -0.83 l/min         | -1.5%             | 0%                 | —           | 1.1, 1.1, 0.5, 3.4, 3.6                                                              | CXR diaphragmatic paresis 60% vs. 33%                                                                                                                      |
| Concentration effect                                |                    |                                           |                                    |                 |                     |                   |                    |             |                                                                                      |                                                                                                                                                            |
| Al-Kaisy <i>et al.</i> , <sup>36</sup> 1999, n = 11 | US, PFTs           | 100%                                      | -21.8%                             | -25.4%          | -15.2%              | —                 | 0%                 | —           | —                                                                                    | Volunteer study                                                                                                                                            |
| Casati <i>et al.</i> , <sup>53</sup> 1999, n = 30   | US, PFTs           | 100%                                      | -9.4%<br>-40%                      | -13.4%<br>-39%  | -16.7%<br>—         | —                 | 0%<br>33%          | —           | No analgesia, 0 patients                                                             | No difference in pain scores. Longer time to first analgesic with both ropivacaine groups.                                                                 |
|                                                     |                    | 100%                                      | -38%                               | -41%            | —                   | —                 | 0%                 | —           | No analgesia, 0 patients                                                             |                                                                                                                                                            |
|                                                     |                    | 100%                                      | -30%                               | -40%            | —                   | —                 | 8.3%               | —           | No analgesia, 2 patients (20%)                                                       |                                                                                                                                                            |

(Continued)

Table 2. (Continued)

| Study                                                                               | Monitoring for PNP | US Evidence of PNP                        | Incidence/Magnitude     |               |                     |                   |         | Analgesic Outcomes                                         |                                                      |                                                                                                                                                                     | Remarks |
|-------------------------------------------------------------------------------------|--------------------|-------------------------------------------|-------------------------|---------------|---------------------|-------------------|---------|------------------------------------------------------------|------------------------------------------------------|---------------------------------------------------------------------------------------------------------------------------------------------------------------------|---------|
|                                                                                     |                    |                                           | FEV <sub>1</sub> Change | FVC Change    | PEFR Change         | Oxygen Saturation | Dyspnea | Pain Scores                                                | Analgesic Consumption                                |                                                                                                                                                                     |         |
| Wong <i>et al.</i> , <sup>43</sup> 2016, n = 50                                     | US, PFTs           | 66%                                       | -28%                    | -33%          | -34%                | No desaturations  | 0%      | NRS at 30 min, 0; 60 min, 0; AUC POD 0-3, 8.4              | PACU fentanyl, 18 µg; 72-h codeine, 55 mg            | Only difference in 72-h codeine requirement, no other pain score or analgesic consumption differences                                                               |         |
| Al-Kaisy <i>et al.</i> , <sup>54</sup> 1998, n = 30                                 |                    | 35%                                       | -20%                    | -22%          | -27%                | No desaturations  | 0%      | 0, 0, 12.8                                                 | 25, 102                                              |                                                                                                                                                                     |         |
| Concentration and volume effect<br>Pippa <i>et al.</i> , <sup>55</sup> 2006, n = 60 |                    | —                                         | —                       | —             | —                   | —                 | —       | VAS at 20 min, 8.1; 30 min, 6.9; 60 min, 5.0; 120 min, 3.6 | PACU morphine, 9.5 mg                                | —                                                                                                                                                                   |         |
|                                                                                     |                    | —                                         | —                       | —             | —                   | —                 | —       | 3.4, 3.5, 2.5, 2.2                                         | PACU morphine, 2.7 mg                                |                                                                                                                                                                     |         |
|                                                                                     | US                 | 0%<br>27%                                 | —<br>—                  | —<br>—        | —<br>—              | —<br>—            | —<br>—  | —<br>—                                                     | —<br>—                                               | Significantly better clinical outcomes and degree of analgesia in high-volume, low-concentration group in all regions of upper limb except for lateral neck and arm |         |
| Zhai <i>et al.</i> , <sup>56</sup> 2016, n = 95                                     | US                 | 70%                                       | —                       | —             | —                   | —                 | —       | NRS at PACU, 0; 4 h, 0; 8 h, 0; 24 h, 0; worst, 3          | —                                                    | No significant difference in diaphragmatic paresis, pain scores, or satisfaction                                                                                    |         |
| Injection below C6<br>Renes <i>et al.</i> , <sup>15</sup> 2009, n = 30              |                    | 69%<br>58%                                | —<br>—                  | —<br>—        | —<br>—              | —<br>—            | —<br>—  | 0, 0, 0, 1, 3<br>0, 0, 0, 1, 3                             | —<br>—                                               |                                                                                                                                                                     |         |
|                                                                                     | US, PFTs           | Sigh, -95%; sniff, -87%                   | -0.9 l (-33%)           | -1.2 l (-36%) | -105.1 l/min (-28%) | —                 | —       | NRS at 30 min, 2                                           | 13% needing morphine                                 | No significant difference in pain scores or analgesic consumption                                                                                                   |         |
| Petrar <i>et al.</i> , <sup>41</sup> 2015, n = 64                                   | US                 | -11%, + 60%<br>Partial, 9%; complete, 34% | -0.1 l (-4%)            | -0.1 l (-3%)  | -8 l/min (-2%)      | —                 | 25%     | NRS at 30 min, 2                                           | 13% needing morphine                                 | Suprascapular vs. infraclavicular blocks                                                                                                                            |         |
| Extrascapial injection<br>Palhais <i>et al.</i> , <sup>17</sup> 2016, n = 40        |                    | Partial, 9%; complete, 3%                 | —                       | —             | —                   | —                 | 16%     | —                                                          | —                                                    |                                                                                                                                                                     |         |
|                                                                                     | US, PFTs           | 90%                                       | -0.9 l (-28%)           | -1.2 l (-28%) | -2.1 l/s (-24%)     | —                 | 30%     | NRS at PACU, 0.5; 24 h, 1.6                                | PACU rescue (n), 0; 24-h MEQ, 5 mg; 48-h MEQ, 7.5 mg | No significant difference in analgesic consumption after PACU                                                                                                       |         |
|                                                                                     |                    | 21%                                       | -0.6 l (-16%)           | -0.8 l (-17%) | -0.7 l/s (-8%)      | —                 | 0%      | 0.4, 1.6                                                   | 5, 5, 10 mg                                          |                                                                                                                                                                     |         |
| (Continued)                                                                         |                    |                                           |                         |               |                     |                   |         |                                                            |                                                      |                                                                                                                                                                     |         |

(Continued)

Table 2. (Continued)

| Study                                                                  | Monitoring for PNP     | US Evidence of PNP          | Incidence/Magnitude     |            |             |                   |         | Analgesic Outcomes                                       |                                     |        | Remarks                                                                                                                                  |
|------------------------------------------------------------------------|------------------------|-----------------------------|-------------------------|------------|-------------|-------------------|---------|----------------------------------------------------------|-------------------------------------|--------|------------------------------------------------------------------------------------------------------------------------------------------|
|                                                                        |                        |                             | FEV <sub>1</sub> Change | FVC Change | PEFR Change | Oxygen Saturation | Dyspnea | Pain Scores                                              | Analgesic Consumption               |        |                                                                                                                                          |
| Catheter technique<br>Renes <i>et al.</i> , <sup>57</sup> 2010, n = 20 | US, PFTs               | 0% in all patients at 2 h   | 0%                      | 0%         | 0%          | —                 | —       | —                                                        | —                                   | —      | No changes in respiratory function with ≤6ml injection, but changes after 24h of infusion of 6 ml/h 0.2% ropivacaine in 100% of patients |
| Stundner <i>et al.</i> , <sup>58</sup> 2016, n = 30                    | US, PEFR               | 53%                         | —                       | —          | −2.66 l/min | —                 | —       | —                                                        | Intraoperative fentanyl, 200 µg     | 150 µg | Nonsignificant difference in PNP. No significant difference in rest or dynamic pain scores or analgesic consumption.                     |
| Hartrick <i>et al.</i> , <sup>42</sup> 2012, n = 36                    | US                     | −65% excursion              | —                       | —          | —           | —                 | 33%     | NRS at PACU D/C, 0.62; 24h, 2.54; 48 h, 2.15; 12wk, 1.15 | 24-h MEQ, 13.4 mg                   | —      | Only difference at PACU D/C between 5 ml and 20ml, no other pain score or analgesic consumption differences                              |
| Thackeray <i>et al.</i> , <sup>44</sup> 2013, n = 30                   | US, oxygen saturations | 78%                         | —                       | —          | —           | —                 | 0%      | 1.58, 3.33, 2.08, 2.42                                   | 24-h MEQ, 29.8 mg                   | —      | —                                                                                                                                        |
| Koh <i>et al.</i> , <sup>59</sup> 2016, n = 75                         | US                     | Partial, 32%; complete, 63% | —                       | —          | —           | −4.3%             | 0%      | 0                                                        | 2.67, 3.67, 2.67, 1.5               | —      | —                                                                                                                                        |
|                                                                        |                        | Partial, 26%; complete, 24% | —                       | —          | —           | −2.6%             | 0%      | 1                                                        | —                                   | —      | —                                                                                                                                        |
|                                                                        |                        |                             | —                       | —          | —           | —                 | —       | Mean NRS, 2.84                                           | Fentanyl, 0 µg                      | —      | —                                                                                                                                        |
|                                                                        |                        |                             | —                       | —          | —           | —                 | —       | Mean NRS, 2.84                                           | Fentanyl, 7 µg                      | —      | —                                                                                                                                        |
|                                                                        |                        |                             | —                       | —          | —           | —                 | —       | Mean NRS, 2.84                                           | PACU morphine, 1 mg; 24-h MEQ, 8 mg | —      | —                                                                                                                                        |
|                                                                        |                        |                             | —                       | —          | —           | —                 | —       | Mean NRS, 2.57                                           | 0 mg, 7 mg                          | —      | —                                                                                                                                        |
| Wiesmann <i>et al.</i> , <sup>40</sup> 2016, n = 114                   | US, PFTs               | PACU, −82%; POD1, −46%      | −33%                    | −38%       | −32%        | +1%               | 8%      | 0–1                                                      | Ward rescue opioids, 16%            | —      | —                                                                                                                                        |
|                                                                        |                        | PACU, −55%; POD1, −34%      | −32%                    | −30%       | −43%        | +1%               | 7%      | 0–0                                                      | Ward rescue opioids, 5.2%           | —      | —                                                                                                                                        |

Studies are divided into those assessing outcomes noncomparatively, as well as those describing outcomes by comparing volume effect, concentration effect, injection below C6, extrafascial injection, and catheter techniques.

CXR = chest X-ray; D/C = discharge; FEV<sub>1</sub> = forced expiratory flow rate in 1 s; FVC = forced vital capacity; MEQ = morphine equivalents; NRS = numerical rating scale; PACU = postanesthetic care unit; PEFR = peak expiratory flow rates; PFTs = pulmonary function tests; PNP = phrenic nerve palsy; POD = postoperative day; VAS = visual analog score; US = ultrasound.

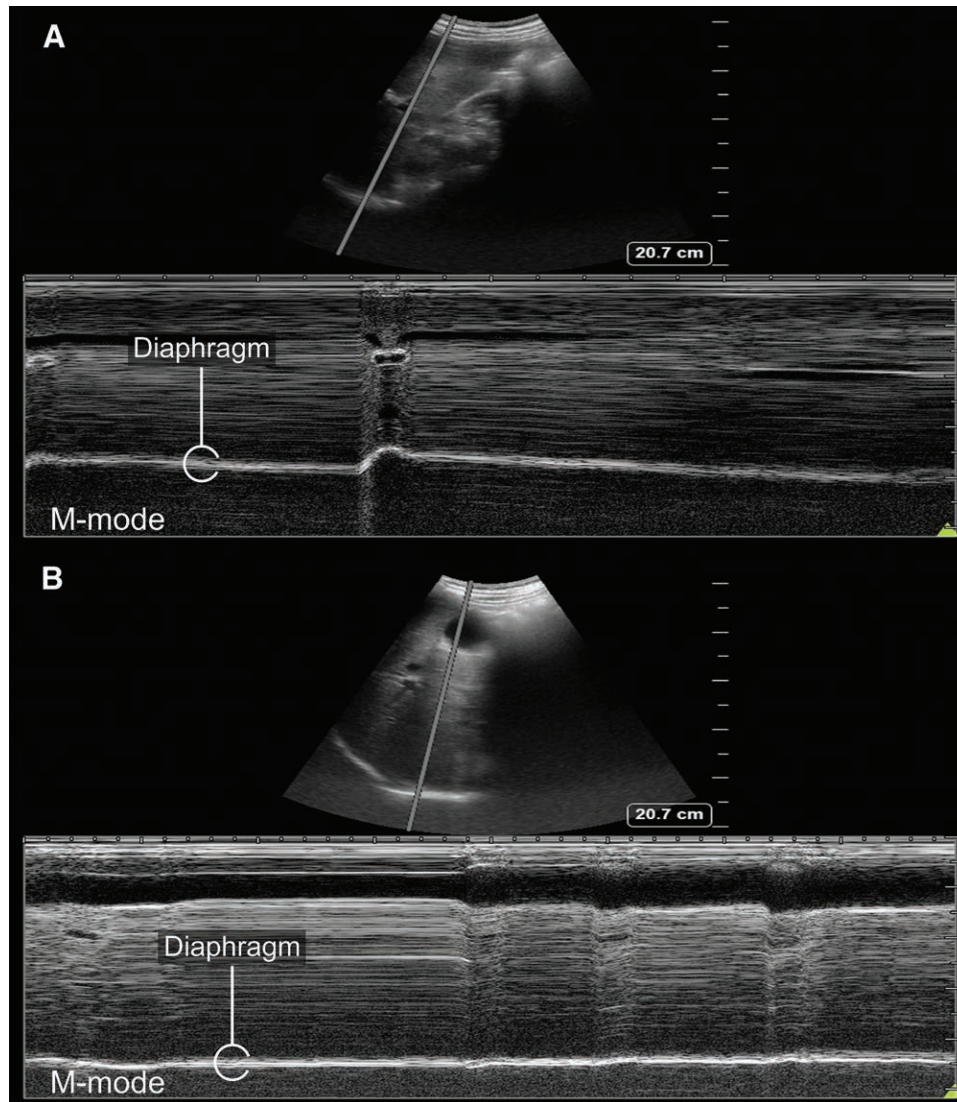

**Fig. 6.** Curved array transducer ultrasound image of the right diaphragm using the liver as an acoustic window in two-dimensional B-mode and M-mode. (A) Preblock sniff test assessment for phrenic nerve palsy. The diaphragm (white circle) is seen to move caudally, toward the probe, in M-mode. (B) Postblock sniff test assessment for phrenic nerve palsy. There is no movement of the diaphragm seen in M-mode, indicating phrenic nerve palsy.

and  $1.6 \pm 0.3$ ,  $5.7 \pm 1.0$ , and  $2.6 \pm 0.5$  cm in women.<sup>60</sup> Once again, it is ideal to obtain baseline measures of diaphragmatic excursion before block performance. Although evidence of hemidiaphragmatic paresis may be seen within 5 min of local anesthetic injection, measurement should be repeated 15 to 30 min after block completion to allow time for the full extent of phrenic nerve palsy to develop.<sup>14,50</sup> In the presence of partial phrenic nerve palsy, a forceful rapid sniff (the sniff test) can demonstrate partial diaphragmatic paresis with a 25 to 75% reduction in caudal movement (toward the transducer) of the diaphragm. Complete phrenic nerve palsy may be diagnosed by paradoxical cephalad movement of the diaphragm<sup>61,62</sup> or a 75% or greater reduction in diaphragmatic movement.<sup>15,41</sup> Diaphragmatic ultrasound has been shown

to have high sensitivity (93%) and specificity (100%) in diagnosing phrenic nerve dysfunction.<sup>63</sup>

An alternative, simpler ultrasound approach that may be used involves placing a high-frequency (10 to 15 MHz) linear array transducer in the coronal plane at the midaxillary line to obtain an intercostal view.<sup>64</sup> At the level of ribs eight to nine on the left and seven to eight on the right, the spleen or liver are centered with the rib shadows on either side (fig. 5). On deep inspiration, caudal descent of the liver or spleen precedes descent of the bright pleural line (fig. 7). The transducer is then moved in both caudal and cephalad directions to visualize the end-inspiratory and end-expiratory levels of the pleural line, respectively, which are then marked on the patient's skin. This process is repeated before and after the chosen regional anesthetic technique with the patient in



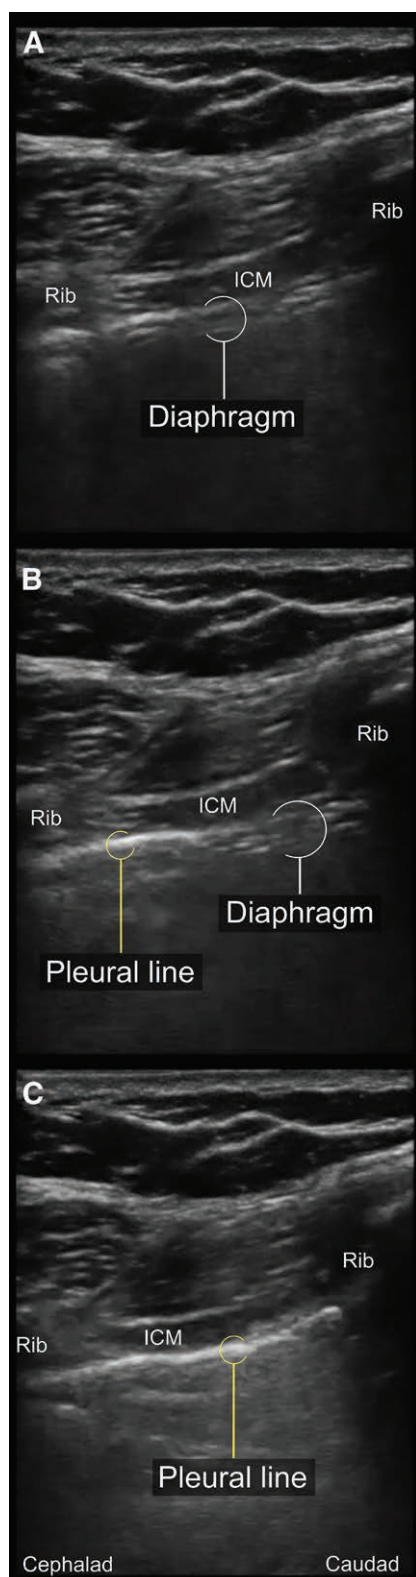

**Fig. 7.** Linear array transducer ultrasound image of the pleura in the right midaxillary line at the level of the seventh and eighth ribs in (A) early inspiration; (B) mid-inspiration; and (C) end-inspiration. The pleural line (yellow circle) can be seen progressively descending with inspiration. The intercostal muscles (ICM) lie superficial to the diaphragm (white circle).

the same position. Minimal change signifies no block, but a reduction in this distance represents phrenic nerve palsy.<sup>65</sup> Although this technique is yet to be validated, it is a simple qualitative assessment that relies on the gross caudad movement of the pleural line during inspiration representing diaphragmatic excursion and thus phrenic nerve function.

### Correlation between Parameters

Quantified sonography of the diaphragm is more sensitive to changes in unilateral diaphragmatic dysfunction than pulmonary function tests and oxygen saturation because the latter two variables assess bilateral pulmonary function simultaneously, including the use of accessory muscles and contralateral diaphragmatic activity. However, there may be some correlation between these parameters. Borgeat *et al.*<sup>66</sup> demonstrated that a 60 to 80% reduction in unilateral diaphragmatic excursion with forced respiration was associated with a 30 to 40% reduction in both vital capacity and FEV<sub>1</sub>. Similarly, our group has demonstrated that hemidiaphragmatic paresis resulted in a decrease in forced vital capacity and FEV<sub>1</sub> to 75 and 78% of baseline, respectively.<sup>36</sup> However, these patients remain asymptomatic and require no treatment. Although there is clearly some correlation between pulmonary function test changes and ultrasound evidence of unilateral diaphragmatic paresis, no study has explicitly and specifically assessed the correlation between ultrasound, pulmonary function test, oxygen saturations, and subjective symptoms of dyspnea.

### Strategies to Reduce Phrenic Nerve Palsy in Regional Anesthesia of the Shoulder

Transient phrenic nerve palsy after regional anesthesia for shoulder surgery results from a direct inhibitory effect of local anesthetic on the phrenic nerve or its roots (C3–C5), and thus minimizing its occurrence depends on reducing the dose of local anesthetic reaching these neural structures. This can be achieved by modifying the local anesthetic dose (volume and concentration),<sup>54</sup> injection site and technique in interscalene block, or by modifying the location of local anesthetic injection and using a different regional anesthetic technique altogether. Ultrasound has been instrumental in the development of these modifications: the increased accuracy of local anesthetic deposition allows the use of lower doses, and direct visualization increases the range of available sites for injection. In the following section, we review the evidence for the effectiveness of these various modifications in minimizing the risk of phrenic nerve palsy while preserving analgesic efficacy.

### Modifications of Interscalene Block

**Local Anesthetic Volume.** There is a clear relationship between the volume of local anesthetic injected during interscalene block and the occurrence of phrenic nerve palsy. This is likely to be related to the greater extent of spread that occurs with larger volumes. An injection around the C5–C6 nerve roots with

volumes of 20 ml or greater inevitably produces phrenic nerve palsy, regardless of localization technique.<sup>16,50,51,53</sup> When an ultrasound-guided technique is used, a volume of 10 ml reduces the incidence of phrenic nerve palsy to as low as 60%,<sup>52</sup> whereas a volume of 5 ml reduces it still further to between 27<sup>58</sup> and 45%,<sup>16</sup> without compromising analgesic efficacy up to 24 h postoperatively.<sup>16,52</sup> Although McNaught *et al.*<sup>67</sup> determined that the minimum effective volume for achieving analgesia for shoulder surgery with ultrasound-guided interscalene block at the C5–C6 nerve root level is as low as 0.9 ml ropivacaine, 0.5%, it must be noted that the duration of analgesia was not assessed formally beyond the first 30 min after surgery. The incidence of respiratory compromise was not reported in this study, so it is unclear whether there are further reductions in the incidence of phrenic nerve palsy at volumes less than 5 ml.

**Local Anesthetic Concentration.** Several studies have shown that reducing local anesthetic concentration independent of volume, thus reducing the dose of drug delivered, also produces a significant decrease in the incidence of phrenic nerve palsy and an improvement in pulmonary function after landmark- or ultrasound-guided interscalene block.<sup>36,43,44</sup> With a nerve stimulator-guided interscalene block, halving the concentration of a 30-ml mixture of 0.5% bupivacaine and 2% lidocaine but doubling the volume led to a reduction in phrenic nerve palsy from 27% to 0%.<sup>55</sup> Halving the concentration of bupivacaine from 0.5% to 0.25% reduced the incidence of phrenic nerve palsy from 100% to 17% when 10 ml was administered *via* a landmark approach<sup>36</sup> and from 78% to 21% when 20 ml was administered with nerve-stimulator localization.<sup>44</sup> Similarly, the incidence of phrenic nerve palsy was reduced from 71% to 42% by halving the concentration of 20 ml ropivacaine from 0.2% to 0.1% in an ultrasound-guided interscalene block.<sup>43</sup> Unfortunately, this reduction in phrenic nerve palsy generally appears to come at the expense of reduced analgesic efficacy. The reduction in local anesthetic concentration and dose decreased duration of sensory blockade by 34% and increased postoperative opioid requirements by up to 50%.<sup>43,44</sup> Zhai *et al.*<sup>56</sup> demonstrated that there is no significant difference in the incidence of phrenic nerve palsy with a fixed 50-mg dose of ropivacaine for ultrasound-guided interscalene block using concentrations of 0.25, 0.5, or 0.75%, with minimal effect on analgesic outcomes.

### Site of Injection.

**Periplexus Injection.** Recently, the concept of ultrasound-guided periplexus (between the interscalene muscles and brachial plexus nerve sheath) injection of local anesthetic has been introduced for interscalene block. Palhais *et al.*<sup>17</sup> recently reported that an ultrasound-guided extrafascial (periplexus) injection of 20 ml bupivacaine 0.5%, performed 4 mm lateral to the brachial plexus sheath not only provided similar analgesia compared with an intraplexus injection between the C5 and C6 roots but also reduced the incidence of diaphragmatic paresis from 90% to 21%. In addition, FEV<sub>1</sub>, forced vital capacity, and peak expiratory flow rates

were less affected in the extrafascial group compared with an intraplexus injection, decreasing by 16 *versus* 28%, 17 *versus* 28%, and 8 *versus* 24%, respectively.<sup>17</sup>

**Intrafascial Injection Below C6 Level.** Another strategy to avoid phrenic nerve palsy involves injecting local anesthetic further away from the C5 and C6 roots and phrenic nerve. Renes *et al.*<sup>15</sup> showed that ultrasound-guided injection of 10 ml ropivacaine 0.75%, around the C7 nerve root resulted in similar analgesia, but only a 13% incidence of phrenic nerve palsy compared with 93% with a neurostimulation-guided interscalene block using the same dose of local anesthetic. Recovery of diaphragmatic function also was faster in the patients who received the C7 root injection. In a subsequent study, the same authors reported that the minimum effective anesthetic volume to achieve complete sensory block of C5 and C6 dermatomes within 30 min in 50% of patients using this technique was 2.9 ml ropivacaine 0.75%. They noted that none of the 20 patients who received 6 ml ropivacaine 0.75%, or less had any evidence of diaphragmatic paresis up to 2 h after injection.<sup>57</sup>

**Injection Posterior versus Interior to the C5–C6 Nerve Roots.** A recent study compared the effect of performing an ultrasound-guided intraplexus injection on the anterior *versus* posterior aspect of the C5–C6 nerve roots with 15 ml ropivacaine 1%.<sup>35</sup> There was a similar reduction of 12 to 28% in all pulmonary function parameters in both groups. Once again, this suggests that the dose and volume of local anesthetic and the caudocephalad level at which it is injected are the most significant factors affecting incidence of phrenic nerve palsy.

**Injection Method.** There are no studies reporting the impact of injection dynamics on phrenic nerve palsy. It is possible that a slower, lower-pressure, titrated injection of low-volume aliquots also may limit spread of injectate to the phrenic nerve, but this is yet to be supported by published evidence. Interestingly, injection of local anesthesia through a catheter appears to produce a less dramatic change in diaphragmatic sonographic excursion than if the same large-volume bolus was injected directly through a needle, possibly supporting a benefit of titrated injection.<sup>66</sup> This suggests that injection dynamics may play an important role in development of diaphragmatic dysfunction and should be investigated further.

### Alternatives to Interscalene Block

The conventional ultrasound-guided interscalene block is a direct carryover from the landmark-guided approach, which relied on the interscalene groove and the anterior tubercle of the C6 transverse process as key landmarks, and thus necessitated a needle approach to the brachial plexus at the root level. This restriction no longer exists; ultrasound allows visualization of the entire brachial plexus and its individual branches, and thus similar analgesic effects can be achieved with more selective injection further away from the phrenic nerve and the C5 and C6 roots.

**Superior Trunk Block.** The superior trunk is formed by the union of C5 and C6 roots and is an appealing alternative target for local anesthetic injection, given that the phrenic nerve has diverged a considerable distance away from the brachial plexus at this level. All the terminal nerves supplying the shoulder arise distal to the origin of the superior trunk and hence analgesic efficacy is not compromised. However, to date, only two case reports of this technique have been published,<sup>68,69</sup> and data supporting its effectiveness in minimizing phrenic nerve palsy are still awaited.

The superior trunk also can be targeted at the supraclavicular brachial plexus level. Injection with 20 to 30 ml local anesthetic is associated with a 25 to 51% incidence of phrenic nerve palsy in both landmark- and ultrasound-guided studies.<sup>11,40,41,59</sup> Nonetheless, inferior sensory block and greater analgesic requirements in shoulder surgery have been reported with supraclavicular brachial plexus block compared with interscalene block.<sup>37,59</sup> This may reflect incomplete blockade of the suprascapular nerve, which has left the brachial plexus at this point. Related to this, placement of a supraclavicular brachial plexus catheter just proximal to the exit of the suprascapular nerve from the common superior trunk sheath has been described; there were apparently no episodes of phrenic nerve palsy with this technique reported in published correspondence.<sup>70</sup> Clinical trials to verify its efficacy are awaited.

**Suprascapular and Axillary Nerve Block.** The risk of phrenic nerve palsy might be eliminated by avoiding injection around the brachial plexus and performing a suprascapular nerve and axillary nerve block instead. The suprascapular nerve provides sensory fibers to approximately 70% of the shoulder joint capsule, and blocking this peripheral nerve can be performed with either a landmark-guided<sup>71–73</sup> or ultrasound-guided technique.<sup>4,74,75</sup> The suprascapular nerve can either be blocked in the suprascapular fossa or in the root of the neck distal to where it arises from the superior trunk of the brachial plexus.<sup>76</sup> However, large volumes of injection in the latter approach may still potentially lead to local anesthetic spread to the phrenic nerve and its roots.

The axillary nerve is a terminal branch of the posterior cord of the brachial plexus. It may be blocked in the anterior chest where it arises from the posterior cord of the brachial plexus in the infraclavicular and proximal axillary area<sup>77</sup> or posterior to the humerus as it emerges from the quadrangular space.<sup>74,75</sup> This latter approach may occasionally miss the articular branches of the axillary nerve and may be responsible for inferior analgesic outcomes.<sup>78</sup>

In arthroscopic shoulder surgery, suprascapular nerve block alone or combined with an axillary nerve block has been shown to provide superior analgesia compared with placebo or subacromial local anesthetic infiltration<sup>79–81</sup> but is less effective compared with interscalene block.<sup>78,79</sup> Because this peripheral nerve block technique primarily targets the capsular innervation of the shoulder, it also may be less useful in open or extensive shoulder surgery.<sup>82</sup> Nevertheless, this

technique has a good safety record in chronic pain practice<sup>83</sup> and has not been associated with any reported episodes of phrenic nerve palsy to date. In view of the trade-off in analgesic efficacy, suprascapular and axillary nerve blocks are probably best reserved for patients with preexisting respiratory dysfunction or who have other comorbidities (*e.g.*, obesity) that are likely to lead to clinically significant dyspnea and hypoxemia in the presence of unilateral phrenic nerve palsy.

### Catheter Techniques

The risk of phrenic nerve palsy appears to be different between single-shot and continuous interscalene block. Infusion rates of 4 to 6 ml/h will invariably lead to phrenic nerve palsy over the first 24 h, regardless of the concentration of the local anesthetic.<sup>84</sup> Similarly, Renes *et al.*<sup>15</sup> found that although there was no evidence of phrenic nerve palsy 2 h after a small bolus injection of 0.75% ropivacaine at the C7 nerve root, all patients developed either partial or complete phrenic nerve palsy after a 24-h infusion of 0.2% ropivacaine at 6 ml/h.

Strategies that have been proposed to reduce phrenic nerve palsy while preserving analgesic efficacy include limiting infusion rates to 2 ml/h.<sup>85</sup> In a letter to the editor, Tsui and Dillane<sup>86</sup> reported that using an intermittent bolus regimen reduces phrenic nerve palsy; however, this has yet to be confirmed in a formal clinical trial. Another approach is to use a short-acting agent such as lidocaine instead of ropivacaine or bupivacaine. In the event of respiratory compromise due to phrenic nerve palsy, cessation of the infusion should result in a more rapid return of phrenic nerve function.<sup>87</sup> It also may be possible to speed up the resolution of phrenic nerve palsy by administering a bolus of 0.9% sodium chloride through the catheter to “wash off” residual local anesthetic.<sup>86</sup>

### Future Trends

As discussed previously, the use of ultra-low volumes and doses of local anesthetic will minimize the risk of phrenic nerve palsy but at the expense of reduced duration of analgesia. The use of intravenous dexamethasone or perineural local anesthetic adjuvants that prolong the duration of sensory-motor blockade and analgesia<sup>88–90</sup> are a promising way to address this issue and should be specifically studied in this context. However, the potential risk and impact of a prolonged phrenic nerve block must still be considered, because none of the described techniques to date guarantee that this can be avoided completely. Liposomal bupivacaine<sup>91,92</sup> is not approved presently for perineural injection, but using it in local wound infiltration may be an alternative worthy of further study.<sup>93,94</sup> Continued investigation also is needed into the optimal dosing strategy in continuous catheter techniques, as well as the impact of different injection methods, including titrated dosing, the use of low injection pressures, as well as the concept of reversal of phrenic nerve palsy by local anesthetic washout.<sup>86</sup>



## Conclusions

Regional anesthesia continues to be of value in providing analgesia for shoulder surgery, but its benefits must be weighed against the risks, including phrenic nerve palsy. The high incidence of phrenic nerve palsy associated with the conventional technique of interscalene block have led some to propose that “the safest option to avoid phrenic nerve block would be to avoid performing an interscalene block” altogether.<sup>3</sup> However, the evidence indicates first that temporary phrenic nerve palsy is inconsequential in the vast majority of healthy patients and, second, that relatively simple modifications such as minimizing local anesthetic doses and injection volumes (to less than 10 ml), as well as performing injection further distal to the C5–C6 nerve roots (*e.g.*, at the level of the superior trunk or supraclavicular brachial plexus), will significantly reduce the incidence of phrenic nerve palsy. Combined suprascapular and axillary nerve blocks are another alternative to consider in scenarios in which avoiding phrenic nerve palsy is critical, particularly in arthroscopic shoulder surgery. We encourage practitioners to use the principles and methods outlined in this article to refine and tailor their regional anesthetic strategy to each patient in their care, taking into account all the medical and surgical considerations pertinent to that individual.

## Acknowledgments

The authors thank Maria Fernanda Rojas Gomez, M.D., Staff Anesthesiologist, Sociedad Especializada de Anestesiología SEA S.A. Fundacion Oftalmologica de Santander, Clinica Carlos Ardila Lulle, Floridablanca, Santander, Colombia, and Danilo Jankovic, M.D., Chief of Staff, Pain Management Center, St. Elisabeth University Hospital, Cologne, Germany, for their invaluable assistance in the production of the illustrations.

## Research Support

Support was provided solely from institutional and/or departmental sources.

## Competing Interests

Dr. Chan receives honoraria from SonoSite, Inc. (Bothell, Washington) and is on the medical advisory board of Smiths Medical (Ashford, United Kingdom) and Aspen Pharmacare (Durban, South Africa). The other authors declare no competing interests.

## Correspondence

Address correspondence to Dr. El-Boghdadly: Department of Anaesthesia, Guy's and St. Thomas' National Health Service Foundation Trust, Great Maze Pond, SE1 9RT, London, United Kingdom. elboghdadly@gmail.com. Information on purchasing reprints may be found at [www.anesthesiology.org](http://www.anesthesiology.org) or on the masthead page at the beginning of this issue. ANESTHESIOLOGY's articles are made freely accessible to all readers, for personal use only, 6 months from the cover date of the issue.

## References

1. Urwin M, Symmons D, Allison T, Brammah T, Busby H, Roxby M, Simmons A, Williams G: Estimating the burden of musculoskeletal disorders in the community: The comparative prevalence of symptoms at different anatomical sites, and the relation to social deprivation. *Ann Rheum Dis* 1998; 57:649–55
2. Mitchell C, Adebajo A, Hay E, Carr A: Shoulder pain: Diagnosis and management in primary care. *BMJ* 2005; 331:1124–8
3. Verelst P, van Zundert A: Incidence of phrenic nerve block after interscalene brachial plexus block. *Reg Anesth Pain Med* 2011; 36:411–2; author reply 412
4. Checcucci G, Allegra A, Bigazzi P, Giancesello L, Ceruso M, Gritti G: A new technique for regional anesthesia for arthroscopic shoulder surgery based on a suprascapular nerve block and an axillary nerve block: An evaluation of the first results. *Arthroscopy* 2008; 24:689–96
5. Verin E, Marie JP, Similowski T: Cartography of human diaphragmatic innervation: Preliminary data. *Respir Physiol Neurobiol* 2011; 176:68–71
6. Kessler J, Schaffhalter-Zoppoth I, Gray AT: An ultrasound study of the phrenic nerve in the posterior cervical triangle: Implications for the interscalene brachial plexus block. *Reg Anesth Pain Med* 2008; 33:545–50
7. Loukas M, Kinsella CR Jr, Louis RG Jr, Gandhi S, Curry B: Surgical anatomy of the accessory phrenic nerve. *Ann Thorac Surg* 2006; 82:1870–5
8. Mendelsohn AH, Deconde A, Lambert HW, Dodson SC, Daney BT, Stark ME, Berke GS, Wisco JJ: Cervical variations of the phrenic nerve. *Laryngoscope* 2011; 121:1920–3
9. Rajanna MJ: Anatomical and surgical considerations of the phrenic and accessory phrenic nerves. *J Int Coll Surg* 1947; 10:42–52
10. Sharma MS, Loukas M, Spinner RJ: Accessory phrenic nerve: A rarely discussed common variation with clinical implications. *Clin Anat* 2011; 24:671–3
11. Neal JM, Moore JM, Kopacz DJ, Liu SS, Kramer DJ, Plorde JJ: Quantitative analysis of respiratory, motor, and sensory function after supraclavicular block. *Anesth Analg* 1998; 86:1239–44
12. Bigeleisen PE: Anatomical variations of the phrenic nerve and its clinical implication for supraclavicular block. *Br J Anaesth* 2003; 91:916–7
13. Urmei WF, McDonald M: Hemidiaphragmatic paresis during interscalene brachial plexus block: Effects on pulmonary function and chest wall mechanics. *Anesth Analg* 1992; 74:352–7
14. Urmei WF, Talts KH, Sharrock NE: One hundred percent incidence of hemidiaphragmatic paresis associated with interscalene brachial plexus anesthesia as diagnosed by ultrasonography. *Anesth Analg* 1991; 72:498–503
15. Renes SH, Rettig HC, Gielen MJ, Wilder-Smith OH, van Geffen GJ: Ultrasound-guided low-dose interscalene brachial plexus block reduces the incidence of hemidiaphragmatic paresis. *Reg Anesth Pain Med* 2009; 34:498–502
16. Riazi S, Carmichael N, Awad I, Holtby RM, McCartney CJ: Effect of local anaesthetic volume (20 vs 5 ml) on the efficacy and respiratory consequences of ultrasound-guided interscalene brachial plexus block. *Br J Anaesth* 2008; 101:549–56
17. Palhais N, Brull R, Kern C, Jacot-Guillarmod A, Charmoy A, Farron A, Albrecht E: Extrafascial injection for interscalene brachial plexus block reduces respiratory complications compared with a conventional intrafascial injection: A randomized, controlled, double-blind trial. *Br J Anaesth* 2016; 116:531–7
18. Pakala SR, Beckman JD, Lyman S, Zayas VM: Cervical spine disease is a risk factor for persistent phrenic nerve paresis following interscalene nerve block. *Reg Anesth Pain Med* 2013; 38:239–42



19. Jules-Elysee K, Reid SC, Kahn RL, Edmonds CR, Urban MK: Prolonged diaphragm dysfunction after interscalene brachial plexus block and shoulder surgery: A prospective observational pilot study. *Br J Anaesth* 2014; 112:950–1
20. Robaux S, Bouaziz H, Boisseau N, Raucoules-Aimé M, Laxenaire MC; S.O.S. Regional Hot Line Service: Persistent phrenic nerve paralysis following interscalene brachial plexus block. *ANESTHESIOLOGY* 2001; 95:1519–21
21. Deruddre S, Vidal D, Benhamou D: A case of persistent hemidiaphragmatic paralysis following interscalene brachial plexus block. *J Clin Anesth* 2006; 18:238–9; author reply 239
22. Ediale KR, Myung CR, Neuman GG: Prolonged hemidiaphragmatic paralysis following interscalene brachial plexus block. *J Clin Anesth* 2004; 16:573–5
23. Bashein G, Robertson HT, Kennedy WF Jr: Persistent phrenic nerve paresis following interscalene brachial plexus block. *ANESTHESIOLOGY* 1985; 63:102–4
24. Kaufman MR, Elkwood AI, Rose MI, Patel T, Ashinoff R, Fields R, Brown D: Surgical treatment of permanent diaphragm paralysis after interscalene nerve block for shoulder surgery. *ANESTHESIOLOGY* 2013; 119:484–7
25. Hogan QH: Phrenic nerve function after interscalene block revisited: Now, the long view. *ANESTHESIOLOGY* 2013; 119:250–2
26. Upton AR, McComas AJ: The double crush in nerve entrapment syndromes. *Lancet* 1973; 2:359–62
27. De A, Hayes JE: Persistent phrenic nerve paresis after interscalene block: A “triple crush” hypothesis of nerve injury. *Reg Anesth Pain Med* 2013; 38:553
28. Fujimura N, Namba H, Tsunoda K, Kawamata T, Taki K, Igarasi M, Namiki A: Effect of hemidiaphragmatic paresis caused by interscalene brachial plexus block on breathing pattern, chest wall mechanics, and arterial blood gases. *Anesth Analg* 1995; 81:962–6
29. Gibson GJ: Diaphragmatic paresis: Pathophysiology, clinical features, and investigation. *Thorax* 1989; 44:960–70
30. Easton PA, Fleetham JA, de la Rocha A, Anthonisen NR: Respiratory function after paralysis of the right hemidiaphragm. *Am Rev Respir Dis* 1983; 127:125–8
31. Knoblanche GE: The incidence and aetiology of phrenic nerve blockade associated with supraclavicular brachial plexus block. *Anaesth Intensive Care* 1979; 7:346–9
32. Hickey R, Ramamurthy S: The diagnosis of phrenic nerve block on chest X-ray by a double-exposure technique. *ANESTHESIOLOGY* 1989; 70:704–7
33. Pere P, Pitkänen M, Rosenberg PH, Björkenheim JM, Linden H, Salorinne Y, Tuominen M: Effect of continuous interscalene brachial plexus block on diaphragm motion and on ventilatory function. *Acta Anaesthesiol Scand* 1992; 36:53–7
34. Smith MP, Tetzlaff JE, Brems JJ: Asymptomatic profound oxyhemoglobin desaturation following interscalene block in a geriatric patient. *Reg Anesth Pain Med* 1998; 23:210–3
35. Bergmann L, Martini S, Kesselmeier M, Armbruster W, Notheisen T, Adamzik M, Eichholz R: Phrenic nerve block caused by interscalene brachial plexus block: Breathing effects of different sites of injection. *BMC Anesthesiol* 2016; 16:45
36. Al-Kaisy AA, Chan VW, Perlas A: Respiratory effects of low-dose bupivacaine interscalene block. *Br J Anaesth* 1999; 82:217–20
37. Ryu T, Kil BT, Kim JH: Comparison between ultrasound-guided supraclavicular and interscalene brachial plexus blocks in patients undergoing arthroscopic shoulder surgery: A prospective, randomized, parallel study. *Medicine (Baltimore)* 2015; 94:e1726
38. Zoremba M, Kratz T, Dette F, Wulf H, Steinfeldt T, Wiesmann T: Supplemental interscalene blockade to general anesthesia for shoulder arthroscopy: Effects on fast track capability, analgesic quality, and lung function. *Biomed Res Int* 2015; 2015:325012
39. Fredrickson MJ, Ball CM, Dalglish AJ: Successful continuous interscalene analgesia for ambulatory shoulder surgery in a private practice setting. *Reg Anesth Pain Med* 2008; 33:122–8
40. Wiesmann T, Feldmann C, Müller HH, Nentwig L, Beermann A, El-Zayat BF, Zoremba M, Wulf H, Steinfeldt T: Phrenic palsy and analgesic quality of continuous supraclavicular vs. interscalene plexus blocks after shoulder surgery. *Acta Anaesthesiol Scand* 2016; 60:1142–51
41. Petrar SD, Seltnerich ME, Head SJ, Schwarz SK: Hemidiaphragmatic paralysis following ultrasound-guided supraclavicular *versus* infraclavicular brachial plexus blockade: a randomized clinical trial. *Reg Anesth Pain Med* 2015; 40:133–8
42. Hartrick CT, Tang YS, Siwek D, Murray R, Hunstad D, Smith G: The effect of initial local anesthetic dose with continuous interscalene analgesia on postoperative pain and diaphragmatic function in patients undergoing arthroscopic shoulder surgery: A double-blind, randomized controlled trial. *BMC Anesthesiol* 2012; 12:6
43. Wong AK, Keeney LG, Chen L, Williams R, Liu J, Elkassabany NM: Effect of local anesthetic concentration (0.2% vs 0.1% ropivacaine) on pulmonary function, and analgesia after ultrasound-guided interscalene brachial plexus block: A randomized controlled study. *Pain Med* 2016; 17:2397–403
44. Thackeray EM, Swenson JD, Gertsch MC, Phillips KM, Steele JW, Burks RT, Tashjian RZ, Greis PE: Diaphragm function after interscalene brachial plexus block: A double-blind, randomized comparison of 0.25% and 0.125% bupivacaine. *J Shoulder Elbow Surg* 2013; 22:381–6
45. Altintas F, Gumus F, Kaya G, Mihmanli I, Kantarci F, Kaynak K, Cansever MS: Interscalene brachial plexus block with bupivacaine and ropivacaine in patients with chronic renal failure: Diaphragmatic excursion and pulmonary function changes. *Anesth Analg* 2005; 100:1166–71
46. Mier-Jedrzejowicz A, Brophy C, Moxham J, Green M: Assessment of diaphragm weakness. *Am Rev Respir Dis* 1988; 137:877–83
47. Fackler CD, Perret GE, Bedell GN: Effect of unilateral phrenic nerve section on lung function. *J Appl Physiol* 1967; 23:923–6
48. Gould L, Kaplan S, McElhinney AJ, Stone DJ: A method for the production of hemidiaphragmatic paralysis. Its application to the study of lung function in normal man. *Am Rev Respir Dis* 1967; 96:812–4
49. Arborelius M Jr, Lilja B, Senyk J: Regional and total lung function studies in patients with hemidiaphragmatic paralysis. *Respiration* 1975; 32:253–64
50. Urmev WF, Gloeggler PJ: Pulmonary function changes during interscalene brachial plexus block: Effects of decreasing local anesthetic injection volume. *Reg Anesth* 1993; 18:244–9
51. Sinha SK, Abrams JH, Barnett JT, Muller JG, Lahiri B, Bernstein BA, Weller RS: Decreasing the local anesthetic volume from 20 to 10 mL for ultrasound-guided interscalene block at the cricoid level does not reduce the incidence of hemidiaphragmatic paresis. *Reg Anesth Pain Med* 2011; 36:17–20
52. Lee JH, Cho SH, Kim SH, Chae WS, Jin HC, Lee JS, Kim YI: Ropivacaine for ultrasound-guided interscalene block: 5 mL provides similar analgesia but less phrenic nerve paralysis than 10 mL. *Can J Anaesth* 2011; 58:1001–6
53. Casati A, Fanelli G, Cedrati V, Berti M, Aldegheri G, Torri G: Pulmonary function changes after interscalene brachial plexus anesthesia with 0.5% and 0.75% ropivacaine: A double-blinded comparison with 2% mepivacaine. *Anesth Analg* 1999; 88:587–92
54. Al-Kaisy A, McGuire G, Chan VW, Bruin G, Peng P, Miniaci A, Perlas A: Analgesic effect of interscalene block using low-dose bupivacaine for outpatient arthroscopic shoulder surgery. *Reg Anesth Pain Med* 1998; 23:469–73

55. Pippa P, Cuomo P, Panchetti A, Scarchini M, Poggi G, D'Arienzo M: High volume and low concentration of anaesthetic solution in the perivascular interscalene sheath determines quality of block and incidence of complications. *Eur J Anaesthesiol* 2006; 23:855–60
56. Zhai W, Wang X, Rong Y, Li M, Wang H: Effects of a fixed low-dose ropivacaine with different volume and concentrations on interscalene brachial plexus block: A randomized controlled trial. *BMC Anesthesiol* 2016; 16: 1–8
57. Renes SH, van Geffen GJ, Rettig HC, Gielen MJ, Scheffer GJ: Minimum effective volume of local anesthetic for shoulder analgesia by ultrasound-guided block at root C7 with assessment of pulmonary function. *Reg Anesth Pain Med* 2010; 35:529–34
58. Stundner O, Meissnitzer M, Brummett CM, Moser S, Forstner R, Koköfer A, Danninger T, Gerner P, Kirchmair L, Fritsch G: Comparison of tissue distribution, phrenic nerve involvement, and epidural spread in standard- vs low-volume ultrasound-guided interscalene plexus block using contrast magnetic resonance imaging: A randomized, controlled trial. *Br J Anaesth* 2016; 116:405–12
59. Koh WU, Kim HJ, Park HS, Choi WJ, Yang HS, Ro YJ: A randomized controlled trial comparing continuous supraclavicular and interscalene brachial plexus blockade for open rotator cuff surgery. *Anaesthesia* 2016; 71:692–9
60. Boussuges A, Gole Y, Blanc P: Diaphragmatic motion studied by m-mode ultrasonography: Methods, reproducibility, and normal values. *Chest* 2009; 135:391–400
61. Lloyd T, Tang YM, Benson MD, King S: Diaphragmatic paralysis: The use of M mode ultrasound for diagnosis in adults. *Spinal Cord* 2006; 44:505–8
62. Gerscovich EO, Cronan M, McGahan JP, Jain K, Jones CD, McDonald C: Ultrasonographic evaluation of diaphragmatic motion. *J Ultrasound Med* 2001; 20:597–604
63. Boon AJ, Sekiguchi H, Harper CJ, Strommen JA, Ghahfarokhi LS, Watson JC, Sorenson EJ: Sensitivity and specificity of diagnostic ultrasound in the diagnosis of phrenic neuropathy. *Neurology* 2014; 83:1264–70
64. Sarwal A, Walker FO, Cartwright MS: Neuromuscular ultrasound for evaluation of the diaphragm. *Muscle Nerve* 2013; 47:319–29
65. El-Boghdadly K, Goffi A, Chan V: Point of care diaphragmatic ultrasonography made easy. *Can J Anaesth* 2017; 64:327–8
66. Borgeat A, Perschak H, Bird P, Hodler J, Gerber C: Patient-controlled interscalene analgesia with ropivacaine 0.2% versus patient-controlled intravenous analgesia after major shoulder surgery: Effects on diaphragmatic and respiratory function. *ANESTHESIOLOGY* 2000; 92:102–8
67. McNaught A, Shastri U, Carmichael N, Awad IT, Columb M, Cheung J, Holtby RM, McCartney CJ: Ultrasound reduces the minimum effective local anaesthetic volume compared with peripheral nerve stimulation for interscalene block. *Br J Anaesth* 2011; 106:124–30
68. Lin JA, Chuang TY, Yao HY, Yang SF, Tai YT: Ultrasound standard of peripheral nerve block for shoulder arthroscopy: A single-penetration double-injection approach targeting the superior trunk and supraclavicular nerve in the lateral decubitus position. *Br J Anaesth* 2015; 115:932–4
69. Burckett-St Laurent D, Chan V, Chin KJ: Refining the ultrasound-guided interscalene brachial plexus block: The superior trunk approach. *Can J Anaesth* 2014; 61: 1098–102
70. Koscielniak-Nielsen ZJ: Supraclavicular catheter may be an alternative to interscalene catheter in patients at risk for respiratory failure after major shoulder surgery. *Reg Anesth Pain Med* 2013; 38:251
71. Matsumoto D, Suenaga N, Oizumi N, Hisada Y, Minami A: A new nerve block procedure for the suprascapular nerve based on a cadaveric study. *J Shoulder Elbow Surg* 2009; 18:607–11
72. Wassef MR: Suprascapular nerve block. A new approach for the management of frozen shoulder. *Anaesthesia* 1992; 47:120–4
73. Risdall JE, Sharwood-Smith GH: Suprascapular nerve block. New indications and a safer technique. *Anaesthesia* 1992; 47:626
74. Price DJ: The shoulder block: A new alternative to interscalene brachial plexus blockade for the control of postoperative shoulder pain. *Anaesth Intensive Care* 2007; 35:575–81
75. Rothe C, Asghar S, Andersen HL, Christensen JK, Lange KH: Ultrasound-guided block of the axillary nerve: A volunteer study of a new method. *Acta Anaesthesiol Scand* 2011; 55:565–70
76. Siegenthaler A, Moriggl B, Mlekusch S, Schliessbach J, Haug M, Curatolo M, Eichenberger U: Ultrasound-guided suprascapular nerve block, description of a novel supraclavicular approach. *Reg Anesth Pain Med* 2012; 37:325–8
77. Gruber H, Peer S, Gruber L, Loescher W, Bauer T, Loizides A: Ultrasound imaging of the axillary nerve and its role in the diagnosis of traumatic impairment. *Ultraschall Med* 2014; 35:332–8
78. Dhir S, Sondekoppam RV, Sharma R, Ganapathy S, Athwal GS: A comparison of combined suprascapular and axillary nerve blocks to interscalene nerve block for analgesia in arthroscopic shoulder surgery: An equivalence study. *Reg Anesth Pain Med* 2016; 41:564–71
79. Singelyn FJ, Lhotel L, Fabre B: Pain relief after arthroscopic shoulder surgery: A comparison of intraarticular analgesia, suprascapular nerve block, and interscalene brachial plexus block. *Anesth Analg* 2004; 99:589–92, table of contents
80. Ritchie ED, Tong D, Chung F, Norris AM, Miniaci A, Vairavanathan SD: Suprascapular nerve block for postoperative pain relief in arthroscopic shoulder surgery: A new modality? *Anesth Analg* 1997; 84: 1306–12
81. Jeske HC, Kralinger F, Wambacher M, Perwanger F, Schoepf R, Oberladstatter J, Krappinger D, Dallapozza C, Hoffmann F: A randomized study of the effectiveness of suprascapular nerve block in patient satisfaction and outcome after arthroscopic subacromial decompression. *Arthroscopy* 2011; 27:1323–8
82. Neal JM, McDonald SB, Larkin KL, Polissar NL: Suprascapular nerve block prolongs analgesia after nonarthroscopic shoulder surgery but does not improve outcome. *Anesth Analg* 2003; 96:982–6, table of contents
83. Shanahan EM, Shanahan KR, Hill CL, Ahern MJ, Smith MD: Safety and acceptability of suprascapular nerve block in rheumatology patients. *Clin Rheumatol* 2012; 31:145–9
84. Choromanski DW, Patel PS, Frederick JM, Lemos SE, Chidiac EJ: The effect of continuous interscalene brachial plexus block with 0.125% ropivacaine vs 0.2% ropivacaine on pain relief, diaphragmatic motility, and ventilatory function. *J Clin Anesth* 2015; 27:619–26
85. Fredrickson MJ, Price DJ: Analgesic effectiveness of ropivacaine 0.2% vs 0.4% via an ultrasound-guided C5-6 root/superior trunk perineural ambulatory catheter. *Br J Anaesth* 2009; 103:434–9
86. Tsui BC, Dillane D: Reducing and washing off local anesthetic for continuous interscalene block. *Reg Anesth Pain Med* 2014; 39:175–6
87. Ip VH, Tsui BC: Lidocaine infusion for continuous interscalene nerve block: Is there evidence for local and systemic benefits? *Can J Anaesth* 2015; 62:321–2
88. Pöpping DM, Elia N, Marret E, Wenk M, Tramèr MR: Clonidine as an adjuvant to local anesthetics for peripheral nerve and plexus blocks: A meta-analysis of randomized trials. *ANESTHESIOLOGY* 2009; 111:406–15
89. Abdallah FW, Brull R: Facilitatory effects of perineural dexmedetomidine on neuraxial and peripheral nerve block: A systematic review and meta-analysis. *Br J Anaesth* 2013; 110:915–25

90. Abdallah FW, Johnson J, Chan V, Murgatroyd H, Ghafari M, Ami N, Jin R, Brull R: Intravenous dexamethasone and perineural dexamethasone similarly prolong the duration of analgesia after supraclavicular brachial plexus block: A randomized, triple-arm, double-blind, placebo-controlled trial. *Reg Anesth Pain Med* 2015; 40:125–32
91. Uskova A, O'Connor JE: Liposomal bupivacaine for regional anesthesia. *Curr Opin Anaesthesiol* 2015; 28:593–7
92. Premkumar A, Samady H, Slone H, Hash R, Karas S, Xerogeanes J: Liposomal bupivacaine for pain control after anterior cruciate ligament reconstruction: A prospective, double-blinded, randomized, positive-controlled trial. *Am J Sports Med* 2016; 44:1680–6
93. Okoroa KR, Lynch JR, Keller RA, Korona J, Amato C, Rill B, Kolowich PA, Muh SJ: Liposomal bupivacaine *versus* interscalene nerve block for pain control after shoulder arthroplasty: A prospective randomized trial. *J Shoulder Elbow Surg* 2016; 25:1742–8
94. Routman HD, Israel LR, Moor MA, Boltuch AD: Local injection of liposomal bupivacaine combined with intravenous dexamethasone reduces postoperative pain and hospital stay after shoulder arthroplasty. *J Shoulder Elbow Surg* 2017; 26:641–7

## ANESTHESIOLOGY REFLECTIONS FROM THE WOOD LIBRARY-MUSEUM

### William B. Quinn, M.D., Eclectic Physician and Occasional “Anaesthetist”

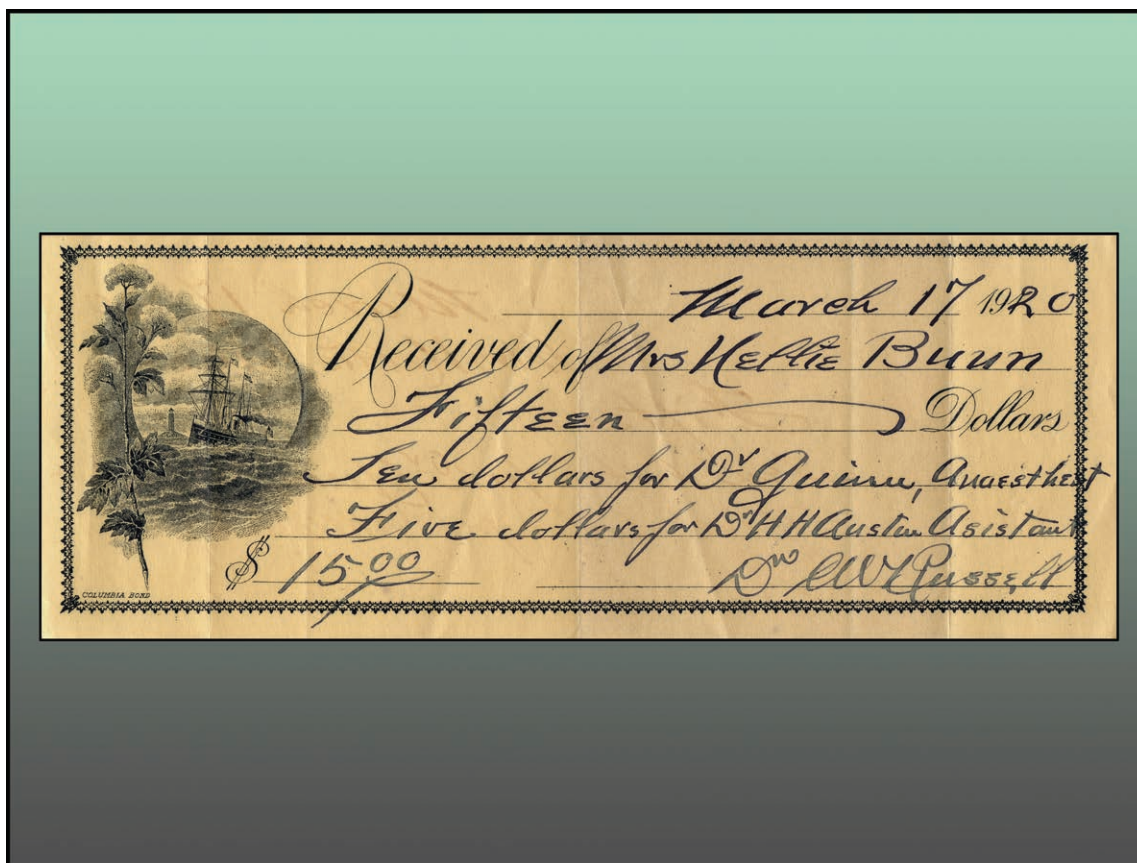

In Springfield, Ohio, on St. Patrick's Day of 1920, a female patient paid \$15 to Clayton W. Russell, M.D. (1866 to 1922). Her receipt from the surgeon (above) allocated \$5 to his surgical assistant, Howard H. Austin, M.D. (1880 to 1915). The remaining \$10 was designated for “Dr. Quinn, Anaesthetist.” So who was Doctor Quinn? A Kentucky native, William Babbit Quinn, M.D. (1892 to 1970), was raised by his Eclectic-physician mother after she was widowed during William's first week of life. Young William followed in his mother's footsteps, graduating in 1913 from her alma mater, the Eclectic Medical Institute of Cincinnati, Ohio. He trained and practiced in Springfield, Ohio, Blackwell's Island, New York, and then Hollywood, California, before settling back in Springfield. The depicted receipt was likely issued from the surgeon's office in the Fairbanks Building, where all three of these Eclectic alumni, Drs. Russell, Austin, and Quinn, maintained professional offices. In this time period, surgeons could charge the equivalent of 5 to 10% of their surgeon's fee from patients to pay for services rendered by the anesthetist. (Copyright © the American Society of Anesthesiologists' Wood Library-Museum of Anesthesiology.)

George S. Bause, M.D., M.P.H., *Honorary Curator and Laureate of the History of Anesthesia, Wood Library-Museum of Anesthesiology, Schaumburg, Illinois, and Clinical Associate Professor, Case Western Reserve University, Cleveland, Ohio.* UJYC@aol.com.
